# Supplementary material for: Defect-focused analysis of calcium-substitution-induced structural transformation of magnesium ferrite nanocrystals
Source: Royal Society of Chemistry journal article supplement (doi:10.1039/c9nj04068d), 2019-12-19

## Electronic supplemental information ESI – I

X-ray diffraction patterns taken before and after the second stage of heating at 500°C for 2½ hours of the MgFe<sub>2</sub>O<sub>4</sub> sample (i.e.,  $x = 0.0$ ), indicating the complete removal of unreacted traces of poly-vinyl alcohol used in the synthesis of the samples.

Title : Defects-focused analysis of calcium-substitution-induced structural transformation of magnesium ferrite nanocrystals

Authors : Ann Rose Abraham, B. Raneesh, D. Sanyal, Sabu Thomas, Nandakumar Kalarikkal and P.M.G. Nambissan

Journal : New Journal of Chemistry

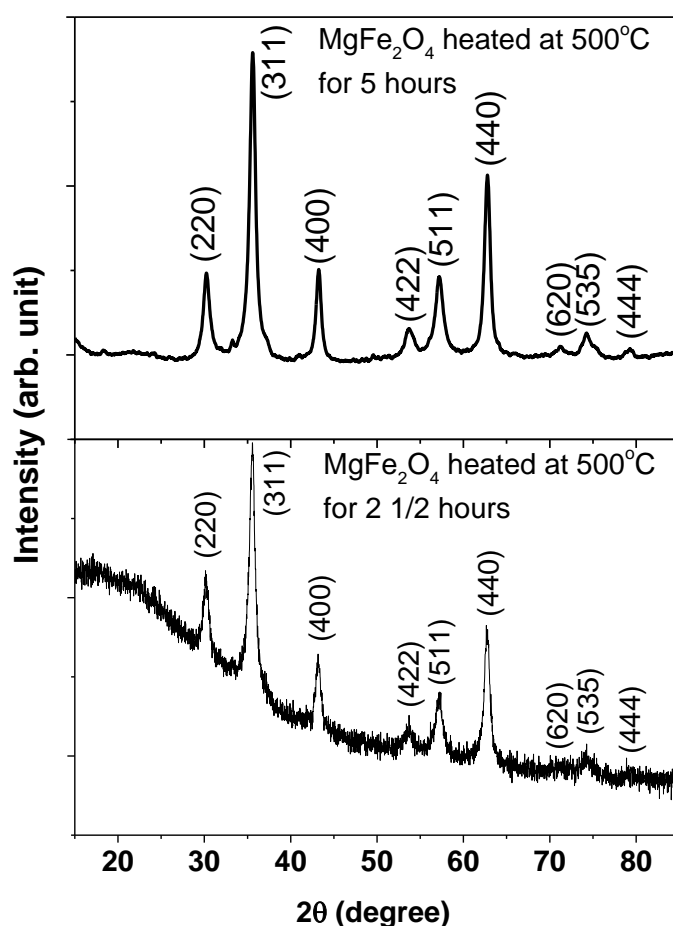

Supplement: c9nj04068d1.pdf [file c9nj04068d1.pdf]
