# Supplementary material for: Defect-focused analysis of calcium-substitution-induced structural transformation of magnesium ferrite nanocrystals
Source: Royal Society of Chemistry journal article supplement (doi:10.1039/c9nj04068d), 2019-12-19
Supplement: c9nj04068d2.pdf [file c9nj04068d2.pdf]

## Electronic supplemental information ESI – II

### Results of EDAX measurements of the Ca-substituted $\text{MgFeO}_4$ samples ( $\text{Mg}_{1-x}\text{Ca}_x\text{Fe}_2\text{O}_4$ ) and the estimations of elemental concentrations from the different regions of the samples examined.

(Quantitation method : Cliff Lorimer thin ratio section; Processing option : All elements analysed (Normalised))

Title : Defects-focused analysis of calcium-substitution-induced structural transformation of magnesium ferrite nanocrystals

Authors : Ann Rose Abraham, B. Raneesh, D. Sanyal, Sabu Thomas, Nandakumar Kalarikkal and P.M.G. Nambissan

Journal : New Journal of Chemistry

#### (i) $\text{MgFe}_2\text{O}_4$ , i.e., $x = 0.0$

|                                                      |                                                                                     |                                                                                                                   |
|------------------------------------------------------|-------------------------------------------------------------------------------------|-------------------------------------------------------------------------------------------------------------------|
| Spectrum Label:<br>Spectrum 1<br><br>Livetime 50.0 s | 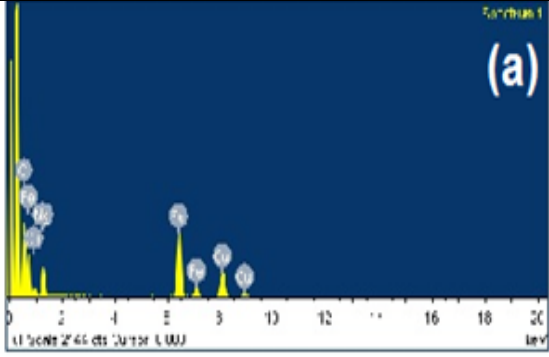 | Element Weight (%) Atomic (%)<br><br>O K 46.99 71.26<br>Mg K 10.11 10.10<br>Fe K 42.90 18.64<br><br>Totals 100.00 |
|------------------------------------------------------|-------------------------------------------------------------------------------------|-------------------------------------------------------------------------------------------------------------------|

Average elemental concentrations :

| Sample                           | Element   | Weight percentage (%) |          | Atomic percentage (%) |          |
|----------------------------------|-----------|-----------------------|----------|-----------------------|----------|
|                                  |           | Calculated            | Measured | Calculated            | Measured |
| MgFe <sub>2</sub> O <sub>4</sub> | Magnesium | 12.15                 | 10.11    | 14.28                 | 10.10    |
|                                  | Calcium   | 0                     | 0        | 0                     | 0        |
|                                  | Iron      | 55.85                 | 42.90    | 28.56                 | 18.64    |
|                                  | Oxygen    | 32.00                 | 46.99    | 57.14                 | 71.26    |

(ii) Mg<sub>0.8</sub>Ca<sub>0.2</sub>Fe<sub>2</sub>O<sub>4</sub>, i.e.,  $x = 0.2$

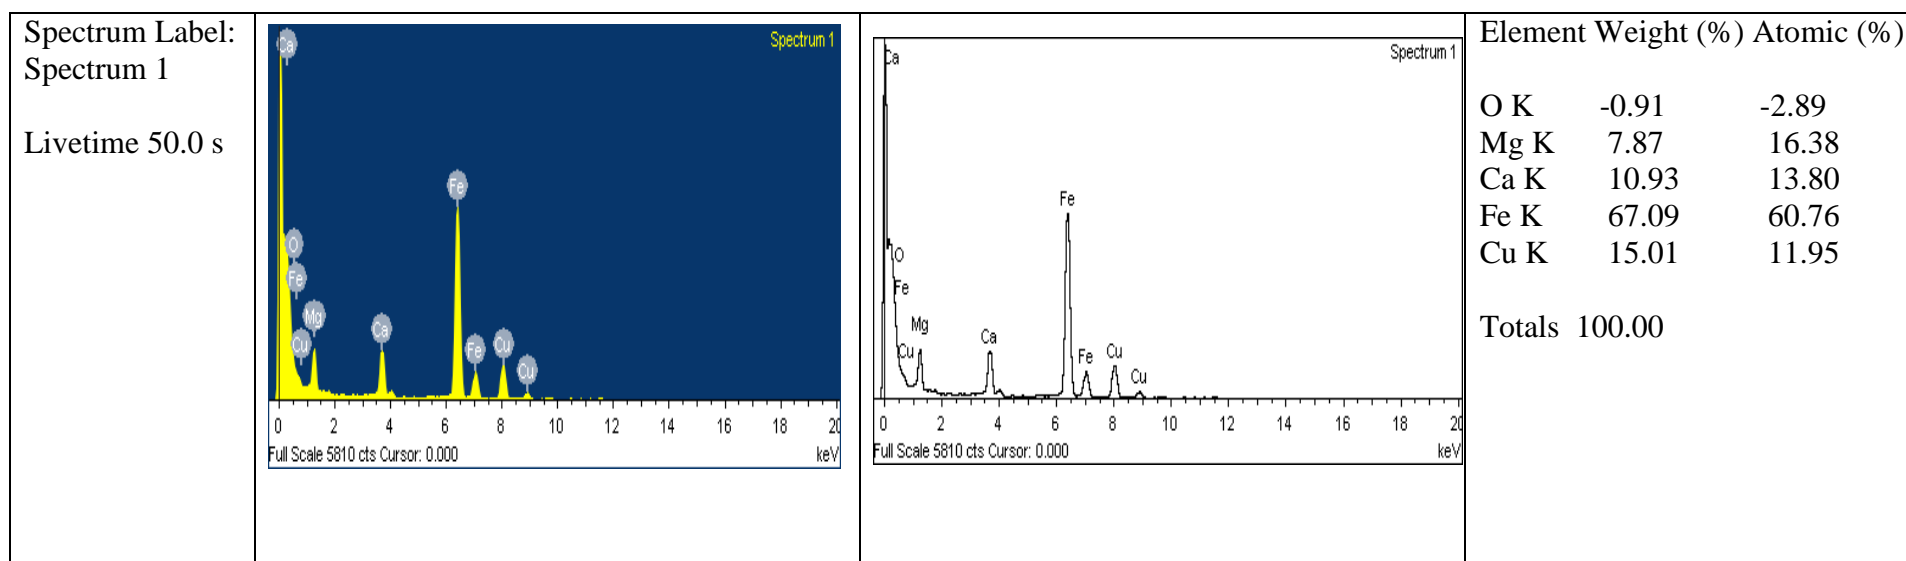

Spectrum processing :  
 Peaks possibly omitted : 1.760, 9.663,  
 11.512 keV

After removing the Cu contents

Spectrum Label:  
 Spectrum 1

Livetime 50.0 s

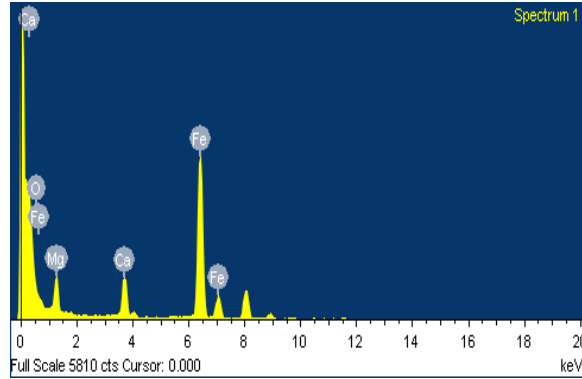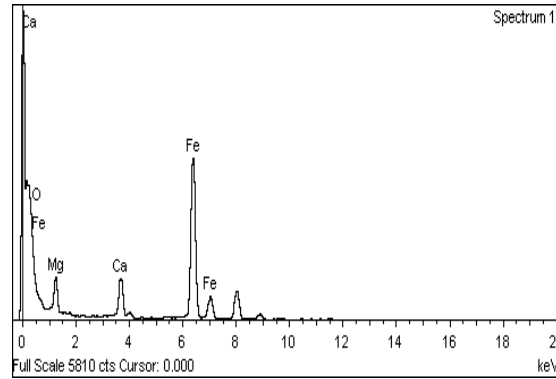

Element Weight (%) Atomic (%)

|      |       |       |
|------|-------|-------|
| O K  | -1.07 | -3.27 |
| Mg K | 9.27  | 18.60 |
| Ca K | 12.87 | 15.67 |
| Fe K | 78.94 | 69.00 |

Totals 100.00

Spectrum processing :  
 Peaks possibly omitted : 1.760, 8.028, 8.886,  
 9.663, 11.512 keV

Spectrum Label:  
 Spectrum 2

Livetime 50.0 s

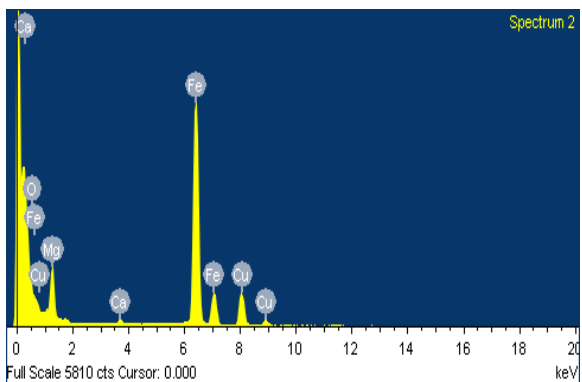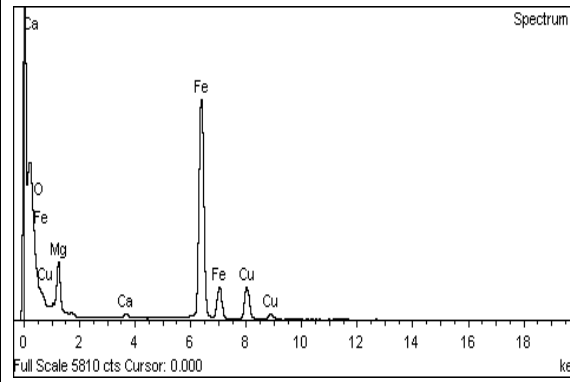

Element Weight (%) Atomic (%)

|      |       |       |
|------|-------|-------|
| O K  | -0.55 | -1.77 |
| Mg K | 8.71  | 18.42 |
| Ca K | 0.82  | 1.06  |
| Fe K | 77.22 | 71.12 |
| Cu K | 13.80 | 11.17 |

Totals 100.00

Spectrum processing :  
 Peaks possibly omitted : 1.745, 2.585, 5.415,  
 9.666, 17.035, 18.035 keV

After removing the Cu contents

Spectrum Label:  
 Spectrum 2  
 Livetime 50.0 s

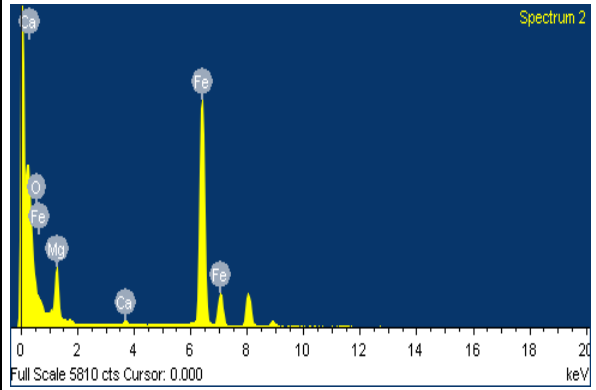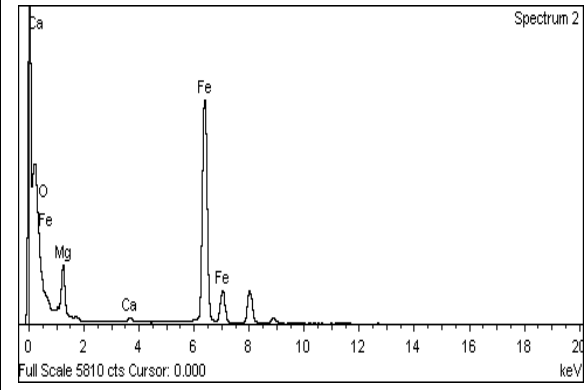

| Element | Weight (%) | Atomic (%) |
|---------|------------|------------|
| O K     | -0.62      | -1.94      |
| Mg K    | 10.11      | 20.74      |
| Ca K    | 0.96       | 1.19       |
| Fe K    | 89.56      | 80.01      |
| Totals  | 100.00     |            |

Spectrum processing :  
 Peaks possibly omitted : 1.745, 2.585, 5.415,  
 8.027, 8.898, 9.666, 17.035, 18.035 keV

Spectrum Label:  
 Spectrum 3  
 Livetime 50.0 s

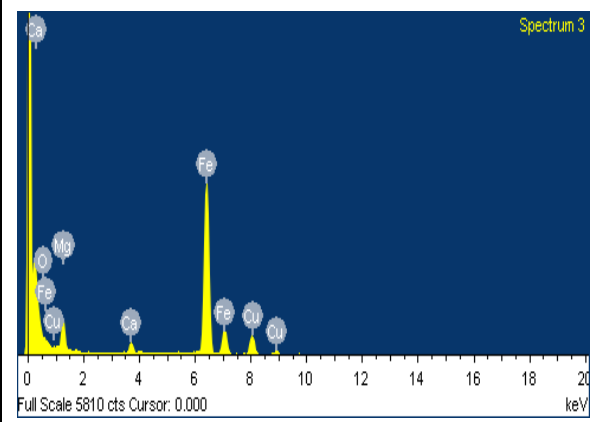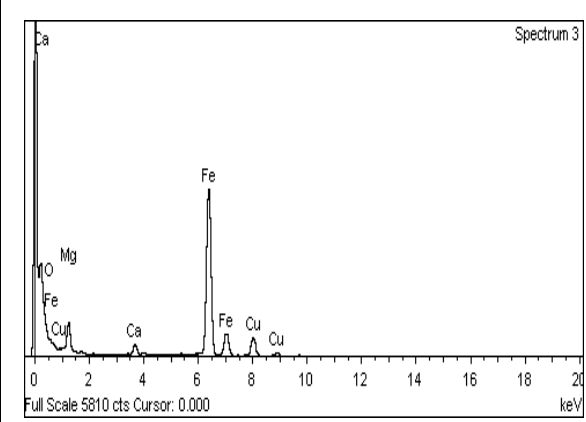

| Element | Weight (%) | Atomic (%) |
|---------|------------|------------|
| O K     | -0.37      | -1.18      |
| Mg K    | 6.80       | 14.48      |
| Ca K    | 3.10       | 4.00       |
| Fe K    | 79.66      | 73.89      |
| Cu K    | 10.81      | 8.81       |
| Totals  | 100.00     |            |

Spectrum processing :  
 Peaks possibly omitted : 5.425, 9.688 keV

After removing the Cu contents

Spectrum Label:  
 Spectrum 3

Livetime 50.0 s

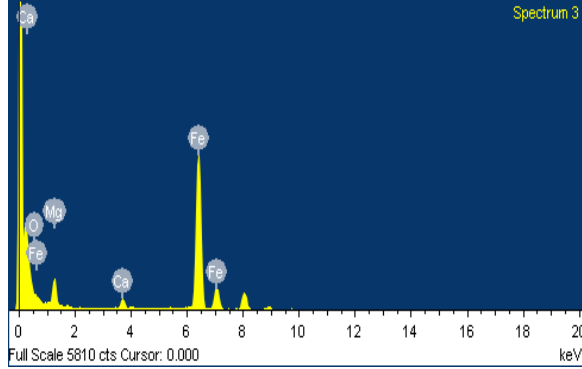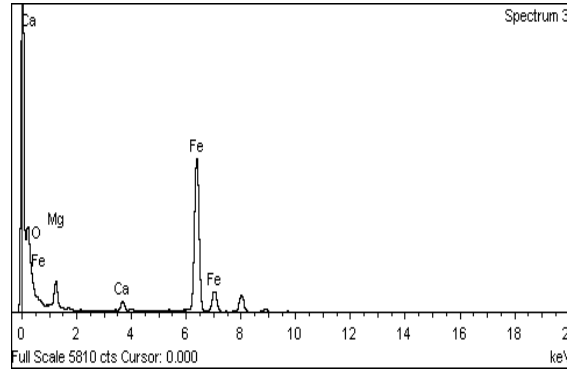

Element Weight (%) Atomic (%)

|      |       |       |
|------|-------|-------|
| O K  | -0.40 | -1.26 |
| Mg K | 7.63  | 15.89 |
| Ca K | 3.47  | 4.39  |
| Fe K | 89.30 | 80.98 |

Totals 100.00

Spectrum processing :  
 Peaks possibly omitted : 5.425, 8.028, 8.884,  
 9.688 keV

Spectrum Label:  
 Spectrum 4

Livetime 22.5 s

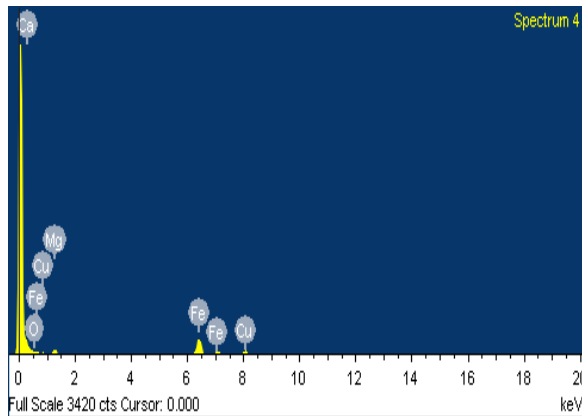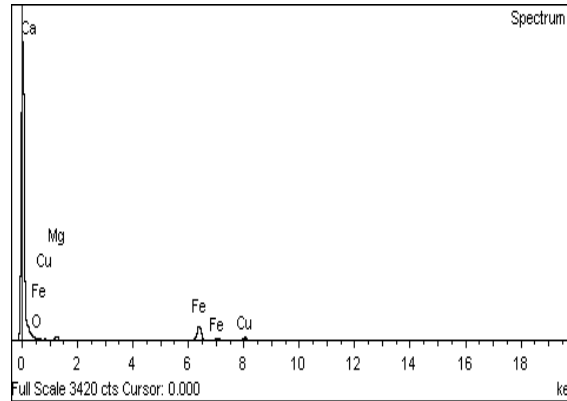

Element Weight (%) Atomic (%)

|      |       |       |
|------|-------|-------|
| O K  | 1.05  | 3.23  |
| Mg K | 9.76  | 19.75 |
| Ca K | 0.64  | 0.79  |
| Fe K | 71.47 | 63.00 |
| Cu K | 17.08 | 13.23 |

Totals 100.00

|                                                              |                                                                                                                                  |                                                                                                                                                                                                                                 |                                                                                                                                                                                                                                                                                                                                                                                                       |     |       |       |      |       |       |      |      |      |      |       |       |        |        |       |        |        |  |
|--------------------------------------------------------------|----------------------------------------------------------------------------------------------------------------------------------|---------------------------------------------------------------------------------------------------------------------------------------------------------------------------------------------------------------------------------|-------------------------------------------------------------------------------------------------------------------------------------------------------------------------------------------------------------------------------------------------------------------------------------------------------------------------------------------------------------------------------------------------------|-----|-------|-------|------|-------|-------|------|------|------|------|-------|-------|--------|--------|-------|--------|--------|--|
|                                                              |                                                                                                                                  | Spectrum processing :<br>No peaks omitted                                                                                                                                                                                       |                                                                                                                                                                                                                                                                                                                                                                                                       |     |       |       |      |       |       |      |      |      |      |       |       |        |        |       |        |        |  |
| After removing the Cu contents                               |                                                                                                                                  |                                                                                                                                                                                                                                 |                                                                                                                                                                                                                                                                                                                                                                                                       |     |       |       |      |       |       |      |      |      |      |       |       |        |        |       |        |        |  |
| <p>Spectrum Label:<br/>Spectrum 4</p> <p>Livetime 22.5 s</p> | 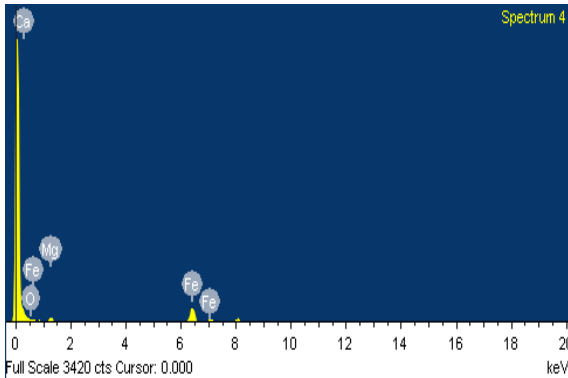 <p>Full Scale 3420 cts Cursor: 0.000 keV</p>  |  <p>Full Scale 3420 cts Cursor: 0.000 keV</p> <p>Spectrum processing :<br/>Peak possibly omitted : 8.031 keV</p>                             | <p>Element Weight (%) Atomic (%)</p> <table border="1"> <tr> <td>O K</td> <td>1.24</td> <td>3.65</td> </tr> <tr> <td>Mg K</td> <td>11.75</td> <td>22.76</td> </tr> <tr> <td>Ca K</td> <td>0.78</td> <td>0.91</td> </tr> <tr> <td>Fe K</td> <td>86.23</td> <td>72.68</td> </tr> <tr> <td>Totals</td> <td>100.00</td> <td></td> </tr> </table>                                                          | O K | 1.24  | 3.65  | Mg K | 11.75 | 22.76 | Ca K | 0.78 | 0.91 | Fe K | 86.23 | 72.68 | Totals | 100.00 |       |        |        |  |
| O K                                                          | 1.24                                                                                                                             | 3.65                                                                                                                                                                                                                            |                                                                                                                                                                                                                                                                                                                                                                                                       |     |       |       |      |       |       |      |      |      |      |       |       |        |        |       |        |        |  |
| Mg K                                                         | 11.75                                                                                                                            | 22.76                                                                                                                                                                                                                           |                                                                                                                                                                                                                                                                                                                                                                                                       |     |       |       |      |       |       |      |      |      |      |       |       |        |        |       |        |        |  |
| Ca K                                                         | 0.78                                                                                                                             | 0.91                                                                                                                                                                                                                            |                                                                                                                                                                                                                                                                                                                                                                                                       |     |       |       |      |       |       |      |      |      |      |       |       |        |        |       |        |        |  |
| Fe K                                                         | 86.23                                                                                                                            | 72.68                                                                                                                                                                                                                           |                                                                                                                                                                                                                                                                                                                                                                                                       |     |       |       |      |       |       |      |      |      |      |       |       |        |        |       |        |        |  |
| Totals                                                       | 100.00                                                                                                                           |                                                                                                                                                                                                                                 |                                                                                                                                                                                                                                                                                                                                                                                                       |     |       |       |      |       |       |      |      |      |      |       |       |        |        |       |        |        |  |
| <p>Spectrum Label:<br/>Spectrum 5</p> <p>Livetime 50.0 s</p> |  <p>Full Scale 5810 cts Cursor: 0.000 keV</p> |  <p>Full Scale 5810 cts Cursor: 0.000 keV</p> <p>Spectrum processing :<br/>Peaks possibly omitted : 2.295, 5.420, 9.706,<br/>11.409 keV</p> | <p>Element Weight (%) Atomic (%)</p> <table border="1"> <tr> <td>O K</td> <td>-0.55</td> <td>-1.71</td> </tr> <tr> <td>Mg K</td> <td>11.76</td> <td>24.06</td> </tr> <tr> <td>Ca K</td> <td>0.76</td> <td>0.95</td> </tr> <tr> <td>Fe K</td> <td>72.43</td> <td>64.50</td> </tr> <tr> <td>Cu K</td> <td>15.59</td> <td>12.20</td> </tr> <tr> <td>Totals</td> <td>100.00</td> <td></td> </tr> </table> | O K | -0.55 | -1.71 | Mg K | 11.76 | 24.06 | Ca K | 0.76 | 0.95 | Fe K | 72.43 | 64.50 | Cu K   | 15.59  | 12.20 | Totals | 100.00 |  |
| O K                                                          | -0.55                                                                                                                            | -1.71                                                                                                                                                                                                                           |                                                                                                                                                                                                                                                                                                                                                                                                       |     |       |       |      |       |       |      |      |      |      |       |       |        |        |       |        |        |  |
| Mg K                                                         | 11.76                                                                                                                            | 24.06                                                                                                                                                                                                                           |                                                                                                                                                                                                                                                                                                                                                                                                       |     |       |       |      |       |       |      |      |      |      |       |       |        |        |       |        |        |  |
| Ca K                                                         | 0.76                                                                                                                             | 0.95                                                                                                                                                                                                                            |                                                                                                                                                                                                                                                                                                                                                                                                       |     |       |       |      |       |       |      |      |      |      |       |       |        |        |       |        |        |  |
| Fe K                                                         | 72.43                                                                                                                            | 64.50                                                                                                                                                                                                                           |                                                                                                                                                                                                                                                                                                                                                                                                       |     |       |       |      |       |       |      |      |      |      |       |       |        |        |       |        |        |  |
| Cu K                                                         | 15.59                                                                                                                            | 12.20                                                                                                                                                                                                                           |                                                                                                                                                                                                                                                                                                                                                                                                       |     |       |       |      |       |       |      |      |      |      |       |       |        |        |       |        |        |  |
| Totals                                                       | 100.00                                                                                                                           |                                                                                                                                                                                                                                 |                                                                                                                                                                                                                                                                                                                                                                                                       |     |       |       |      |       |       |      |      |      |      |       |       |        |        |       |        |        |  |

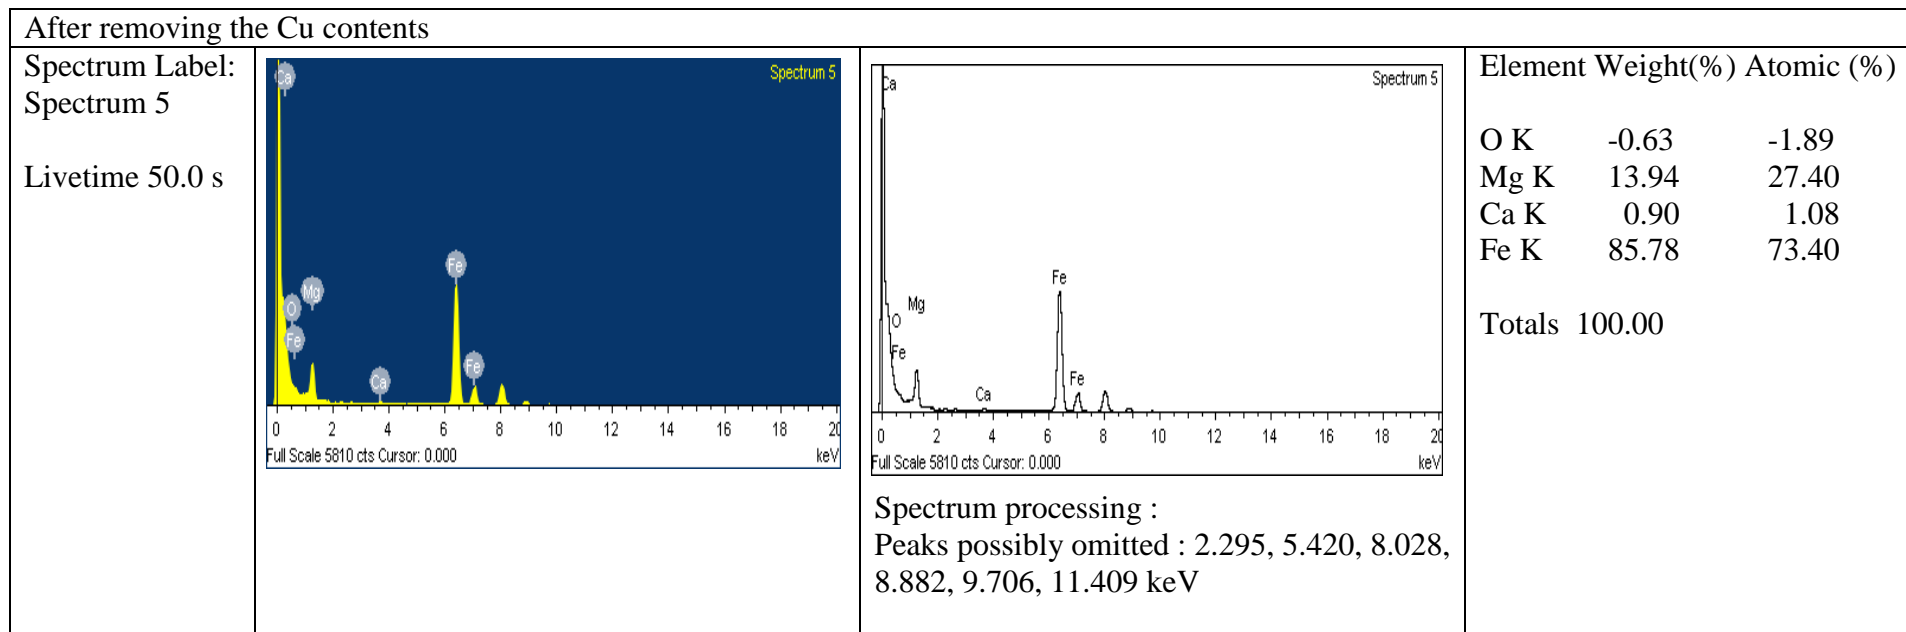

Average elemental concentrations :

| Sample                    | Element   | Weight percentage (%) |          | Atomic percentage (%) |          |
|---------------------------|-----------|-----------------------|----------|-----------------------|----------|
|                           |           | Calculated            | Measured | Calculated            | Measured |
| $Mg_{0.8}Ca_{0.2}Fe_2O_4$ | Magnesium | 9.57                  | 10.54    | 11.43                 | 21.08    |
|                           | Calcium   | 3.95                  | 3.80     | 2.86                  | 4.468    |
|                           | Iron      | 54.98                 | 85.96    | 28.57                 | 75.21    |
|                           | Oxygen    | 31.50                 | -0.30    | 57.14                 | 0.942    |

(iii)  $\text{Mg}_{0.6}\text{Ca}_{0.4}\text{Fe}_2\text{O}_4$ , i.e.,  $x = 0.4$

| <p>Spectrum Label:<br/>Spectrum 1</p> <p>Livetime 50.0 s</p> | 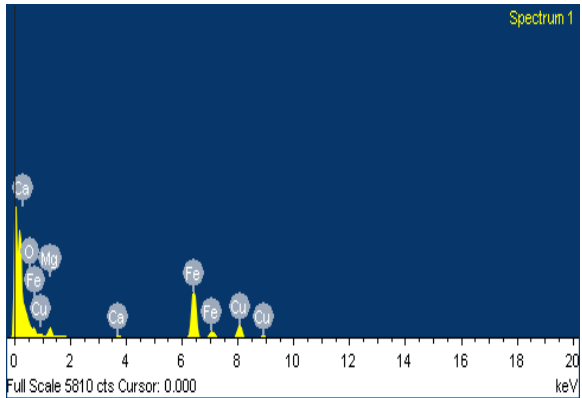 <p>Full Scale 5810 cts Cursor: 0.000 keV</p>  |  <p>Full Scale 5810 cts Cursor: 0.000 keV</p> <p>Spectrum processing :<br/>Peak possibly omitted : 9.701 keV</p>                 | <table border="1"> <thead> <tr> <th>Element</th> <th>Weight (%)</th> <th>Atomic (%)</th> </tr> </thead> <tbody> <tr> <td>O K</td> <td>-0.66</td> <td>-2.21</td> </tr> <tr> <td>Mg K</td> <td>5.62</td> <td>12.46</td> </tr> <tr> <td>Ca K</td> <td>1.90</td> <td>2.56</td> </tr> <tr> <td>Fe K</td> <td>69.59</td> <td>67.20</td> </tr> <tr> <td>Cu K</td> <td>23.54</td> <td>19.98</td> </tr> <tr> <td>Totals</td> <td>100.00</td> <td></td> </tr> </tbody> </table> | Element | Weight (%) | Atomic (%) | O K | -0.66 | -2.21 | Mg K | 5.62 | 12.46 | Ca K | 1.90 | 2.56 | Fe K | 69.59 | 67.20 | Cu K   | 23.54  | 19.98 | Totals | 100.00 |  |
|--------------------------------------------------------------|----------------------------------------------------------------------------------------------------------------------------------|---------------------------------------------------------------------------------------------------------------------------------------------------------------------------------------------------------------------|-----------------------------------------------------------------------------------------------------------------------------------------------------------------------------------------------------------------------------------------------------------------------------------------------------------------------------------------------------------------------------------------------------------------------------------------------------------------------|---------|------------|------------|-----|-------|-------|------|------|-------|------|------|------|------|-------|-------|--------|--------|-------|--------|--------|--|
| Element                                                      | Weight (%)                                                                                                                       | Atomic (%)                                                                                                                                                                                                          |                                                                                                                                                                                                                                                                                                                                                                                                                                                                       |         |            |            |     |       |       |      |      |       |      |      |      |      |       |       |        |        |       |        |        |  |
| O K                                                          | -0.66                                                                                                                            | -2.21                                                                                                                                                                                                               |                                                                                                                                                                                                                                                                                                                                                                                                                                                                       |         |            |            |     |       |       |      |      |       |      |      |      |      |       |       |        |        |       |        |        |  |
| Mg K                                                         | 5.62                                                                                                                             | 12.46                                                                                                                                                                                                               |                                                                                                                                                                                                                                                                                                                                                                                                                                                                       |         |            |            |     |       |       |      |      |       |      |      |      |      |       |       |        |        |       |        |        |  |
| Ca K                                                         | 1.90                                                                                                                             | 2.56                                                                                                                                                                                                                |                                                                                                                                                                                                                                                                                                                                                                                                                                                                       |         |            |            |     |       |       |      |      |       |      |      |      |      |       |       |        |        |       |        |        |  |
| Fe K                                                         | 69.59                                                                                                                            | 67.20                                                                                                                                                                                                               |                                                                                                                                                                                                                                                                                                                                                                                                                                                                       |         |            |            |     |       |       |      |      |       |      |      |      |      |       |       |        |        |       |        |        |  |
| Cu K                                                         | 23.54                                                                                                                            | 19.98                                                                                                                                                                                                               |                                                                                                                                                                                                                                                                                                                                                                                                                                                                       |         |            |            |     |       |       |      |      |       |      |      |      |      |       |       |        |        |       |        |        |  |
| Totals                                                       | 100.00                                                                                                                           |                                                                                                                                                                                                                     |                                                                                                                                                                                                                                                                                                                                                                                                                                                                       |         |            |            |     |       |       |      |      |       |      |      |      |      |       |       |        |        |       |        |        |  |
| <p>After removing the Cu contents</p>                        |                                                                                                                                  |                                                                                                                                                                                                                     |                                                                                                                                                                                                                                                                                                                                                                                                                                                                       |         |            |            |     |       |       |      |      |       |      |      |      |      |       |       |        |        |       |        |        |  |
| <p>Spectrum Label:<br/>Spectrum 1</p> <p>Livetime 50.0 s</p> |  <p>Full Scale 5810 cts Cursor: 0.000 keV</p> |  <p>Full Scale 5810 cts Cursor: 0.000 keV</p> <p>Spectrum processing :<br/>Peaks possibly omitted : 8.040, 8.903, 9.701 keV</p> | <table border="1"> <thead> <tr> <th>Element</th> <th>Weight (%)</th> <th>Atomic (%)</th> </tr> </thead> <tbody> <tr> <td>O K</td> <td>-0.74</td> <td>-2.37</td> </tr> <tr> <td>Mg K</td> <td>7.38</td> <td>15.59</td> </tr> <tr> <td>Ca K</td> <td>2.49</td> <td>3.19</td> </tr> <tr> <td>Fe K</td> <td>90.87</td> <td>83.59</td> </tr> <tr> <td>Totals</td> <td>100.00</td> <td></td> </tr> </tbody> </table>                                                        | Element | Weight (%) | Atomic (%) | O K | -0.74 | -2.37 | Mg K | 7.38 | 15.59 | Ca K | 2.49 | 3.19 | Fe K | 90.87 | 83.59 | Totals | 100.00 |       |        |        |  |
| Element                                                      | Weight (%)                                                                                                                       | Atomic (%)                                                                                                                                                                                                          |                                                                                                                                                                                                                                                                                                                                                                                                                                                                       |         |            |            |     |       |       |      |      |       |      |      |      |      |       |       |        |        |       |        |        |  |
| O K                                                          | -0.74                                                                                                                            | -2.37                                                                                                                                                                                                               |                                                                                                                                                                                                                                                                                                                                                                                                                                                                       |         |            |            |     |       |       |      |      |       |      |      |      |      |       |       |        |        |       |        |        |  |
| Mg K                                                         | 7.38                                                                                                                             | 15.59                                                                                                                                                                                                               |                                                                                                                                                                                                                                                                                                                                                                                                                                                                       |         |            |            |     |       |       |      |      |       |      |      |      |      |       |       |        |        |       |        |        |  |
| Ca K                                                         | 2.49                                                                                                                             | 3.19                                                                                                                                                                                                                |                                                                                                                                                                                                                                                                                                                                                                                                                                                                       |         |            |            |     |       |       |      |      |       |      |      |      |      |       |       |        |        |       |        |        |  |
| Fe K                                                         | 90.87                                                                                                                            | 83.59                                                                                                                                                                                                               |                                                                                                                                                                                                                                                                                                                                                                                                                                                                       |         |            |            |     |       |       |      |      |       |      |      |      |      |       |       |        |        |       |        |        |  |
| Totals                                                       | 100.00                                                                                                                           |                                                                                                                                                                                                                     |                                                                                                                                                                                                                                                                                                                                                                                                                                                                       |         |            |            |     |       |       |      |      |       |      |      |      |      |       |       |        |        |       |        |        |  |



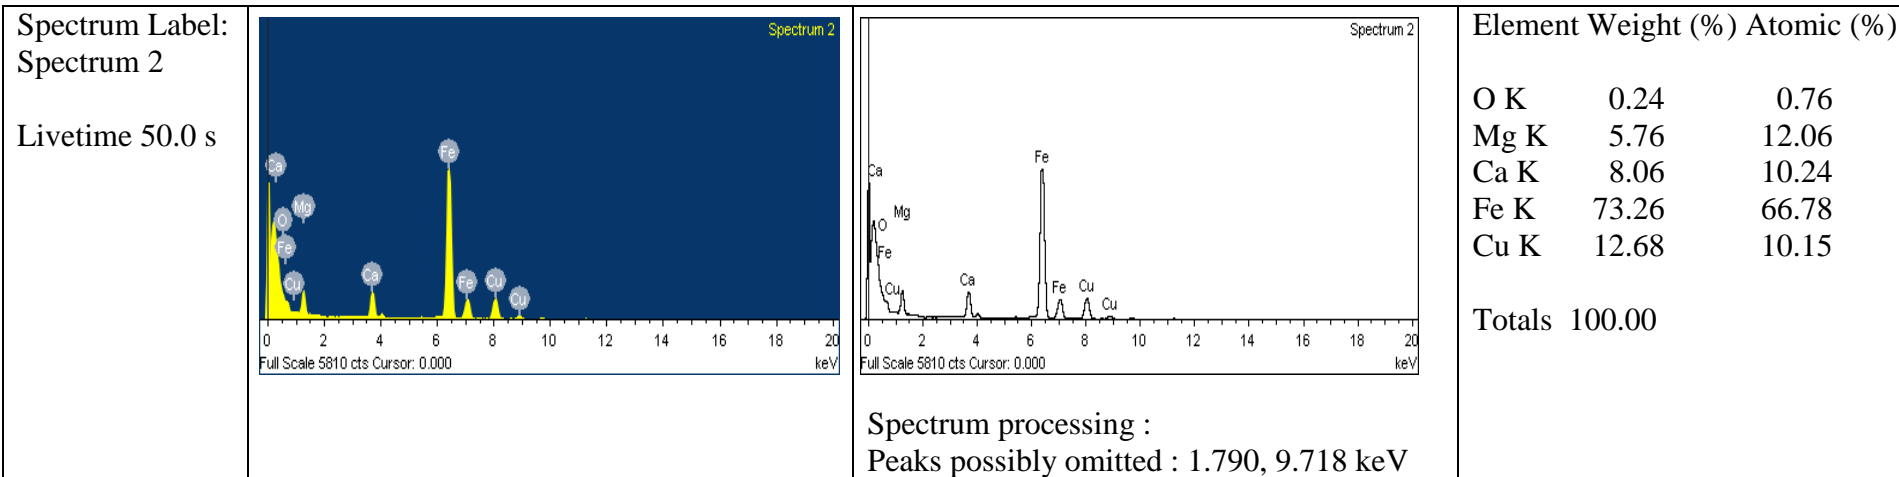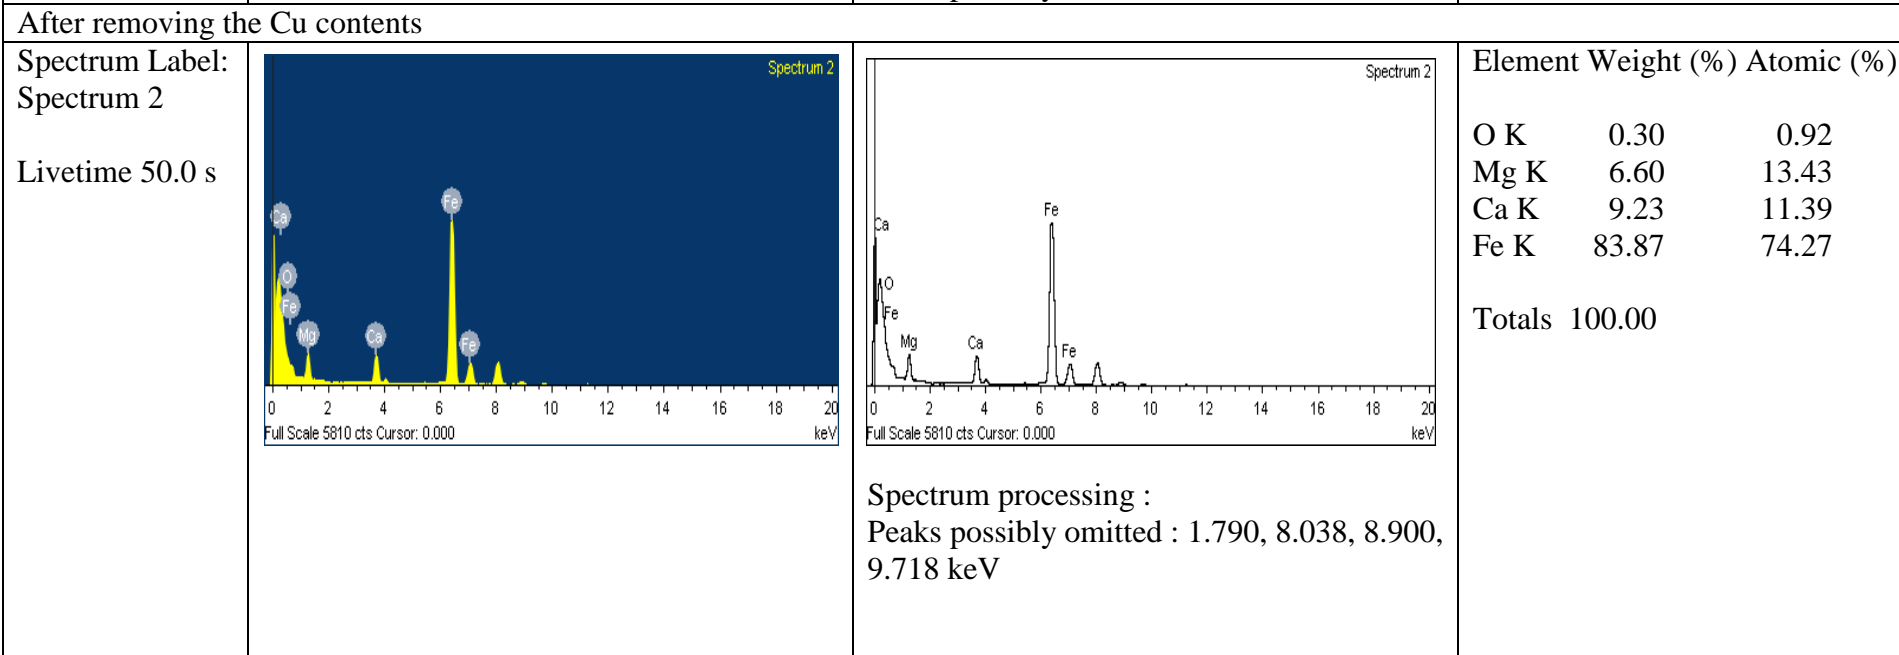

Spectrum Label:  
Spectrum 3

Livetime 50.0 s

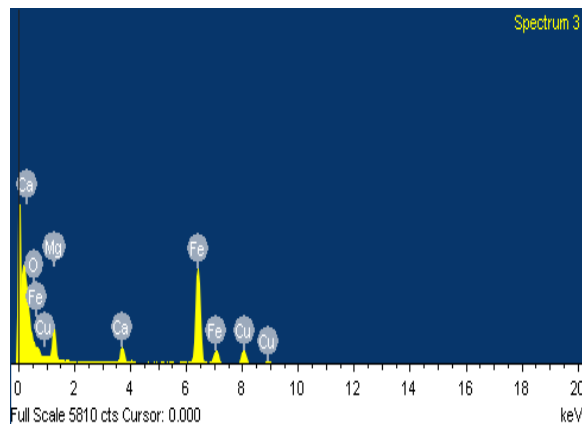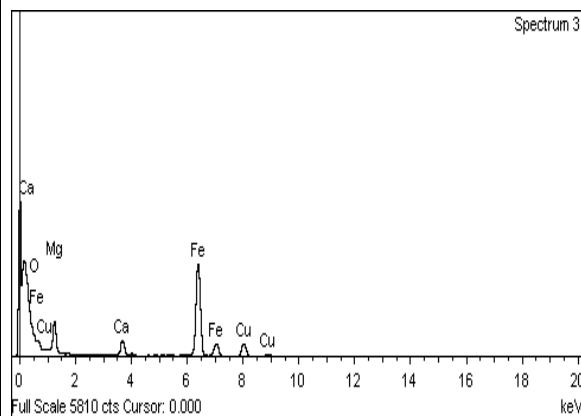

Element Weight (%) Atomic (%)

|      |       |       |
|------|-------|-------|
| O K  | 1.39  | 4.05  |
| Mg K | 11.48 | 22.05 |
| Ca K | 6.90  | 8.04  |
| Fe K | 68.09 | 56.94 |
| Cu K | 12.13 | 8.92  |

Totals 100.00

Spectrum processing :  
Peaks possibly omitted : 1.744, 9.706 keV

After removing the Cu contents

Spectrum Label:  
Spectrum 3

Livetime 50.0 s

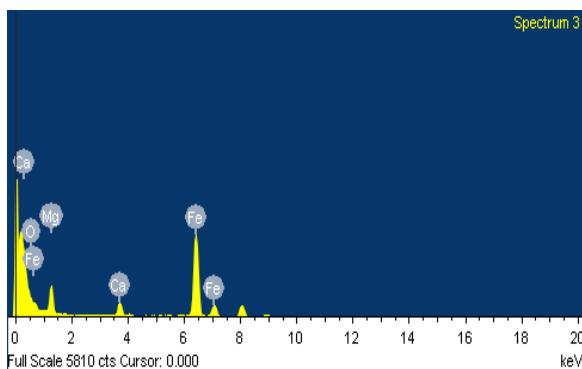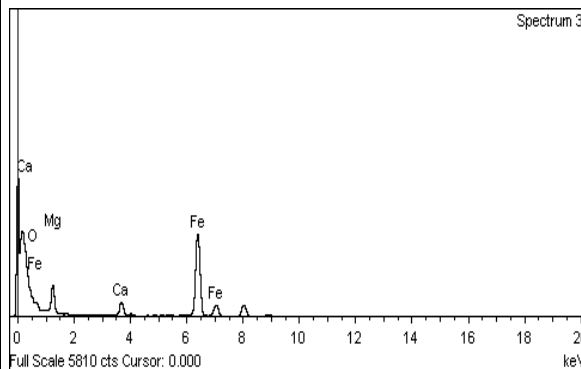

Element Weight (%) Atomic (%)

|      |       |       |
|------|-------|-------|
| O K  | 1.59  | 4.46  |
| Mg K | 13.07 | 24.21 |
| Ca K | 7.85  | 8.83  |
| Fe K | 77.49 | 62.50 |

Totals 100.00

Spectrum processing :  
Peaks possibly omitted : 1.744, 8.039, 8.907,  
9.706 keV

Spectrum Label:  
Spectrum 4

Livetime 50.0 s

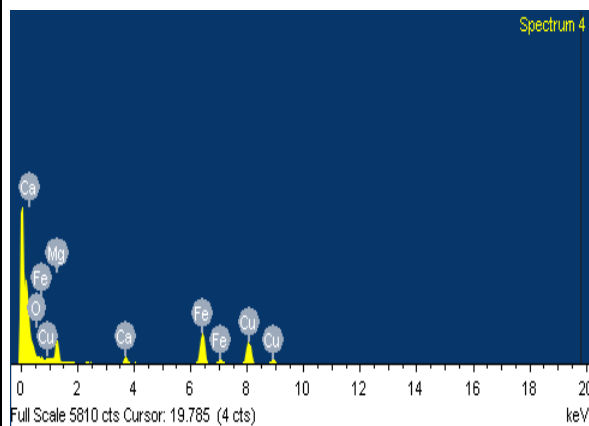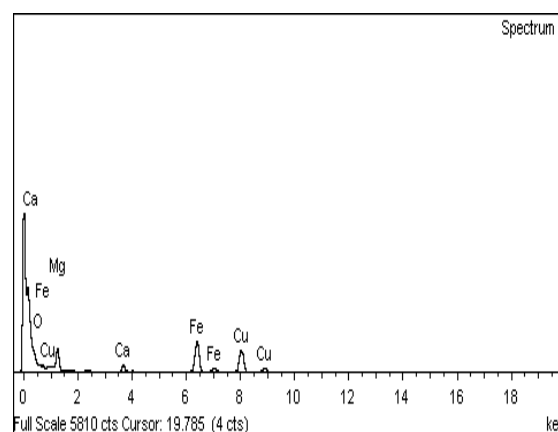

Element Weight (%) Atomic (%)

|      |       |       |
|------|-------|-------|
| O K  | 0.90  | 2.67  |
| Mg K | 14.04 | 27.31 |
| Ca K | 5.71  | 6.74  |
| Fe K | 41.32 | 34.98 |
| Cu K | 38.03 | 28.30 |

Totals 100.00

Spectrum processing :  
Peaks possibly omitted : 9.710, 10.546,  
12.625 keV

After removing the Cu contents

Spectrum Label:  
Spectrum 4

Livetime 50.0 s

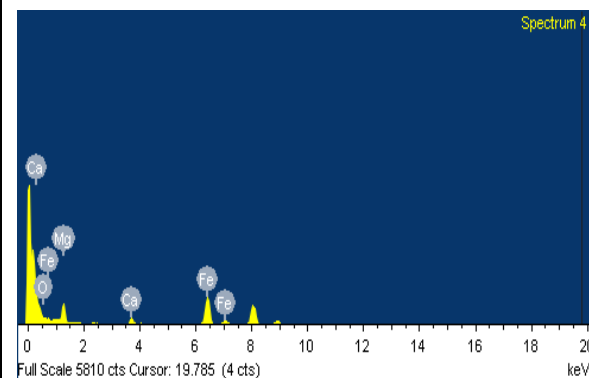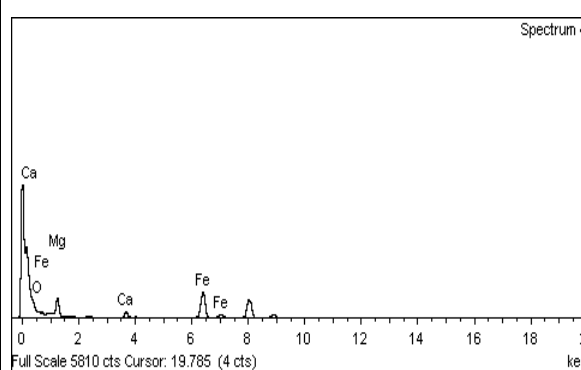

Element Weight (%) Atomic (%)

|      |       |       |
|------|-------|-------|
| O K  | 1.51  | 3.85  |
| Mg K | 22.67 | 38.07 |
| Ca K | 9.21  | 9.38  |
| Fe K | 66.62 | 48.70 |

Totals 100.00

Spectrum processing :  
Peaks possibly omitted : 8.038, 8.901, 9.710,  
10.546, 12.625 keV

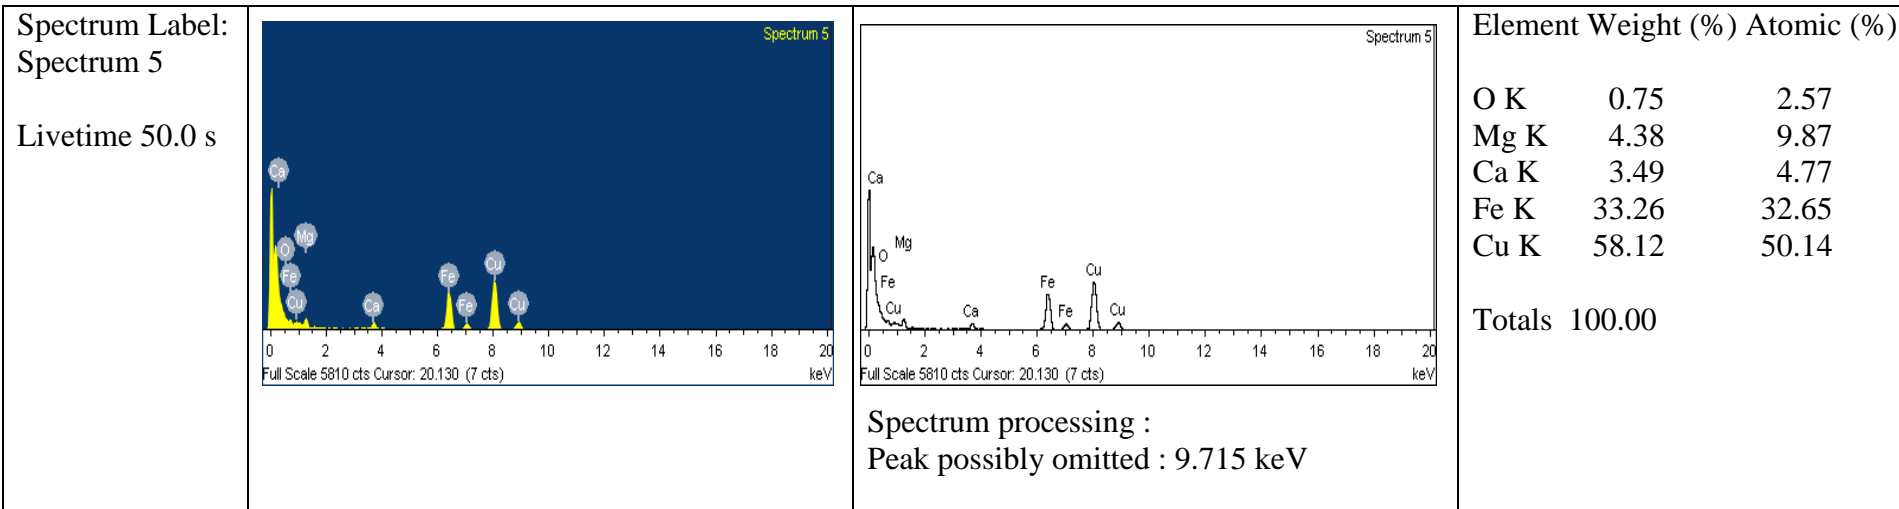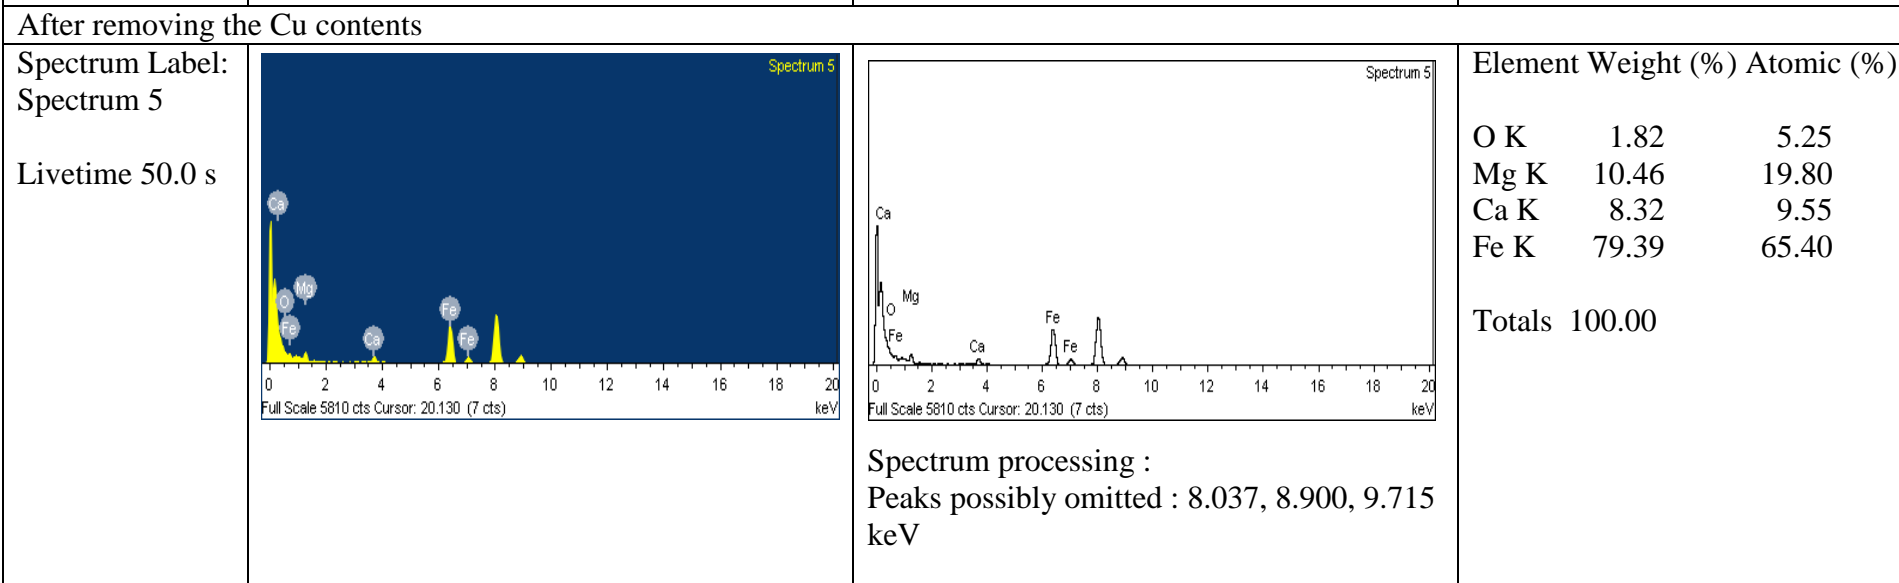

Average elemental concentrations :

| Sample                    | Element   | Weight percentage (%) |          | Atomic percentage (%) |          |
|---------------------------|-----------|-----------------------|----------|-----------------------|----------|
|                           |           | Calculated            | Measured | Calculated            | Measured |
| $Mg_{0.6}Ca_{0.4}Fe_2O_4$ | Magnesium | 7.07                  | 12.04    | 8.57                  | 22.20    |
|                           | Calcium   | 7.77                  | 7.42     | 5.71                  | 8.47     |
|                           | Iron      | 54.14                 | 79.65    | 28.57                 | 66.95    |
|                           | Oxygen    | 31.02                 | 0.89     | 57.15                 | 2.42     |

(iv)  $Mg_{0.4}Ca_{0.6}Fe_2O_4$ , i.e.,  $x = 0.6$

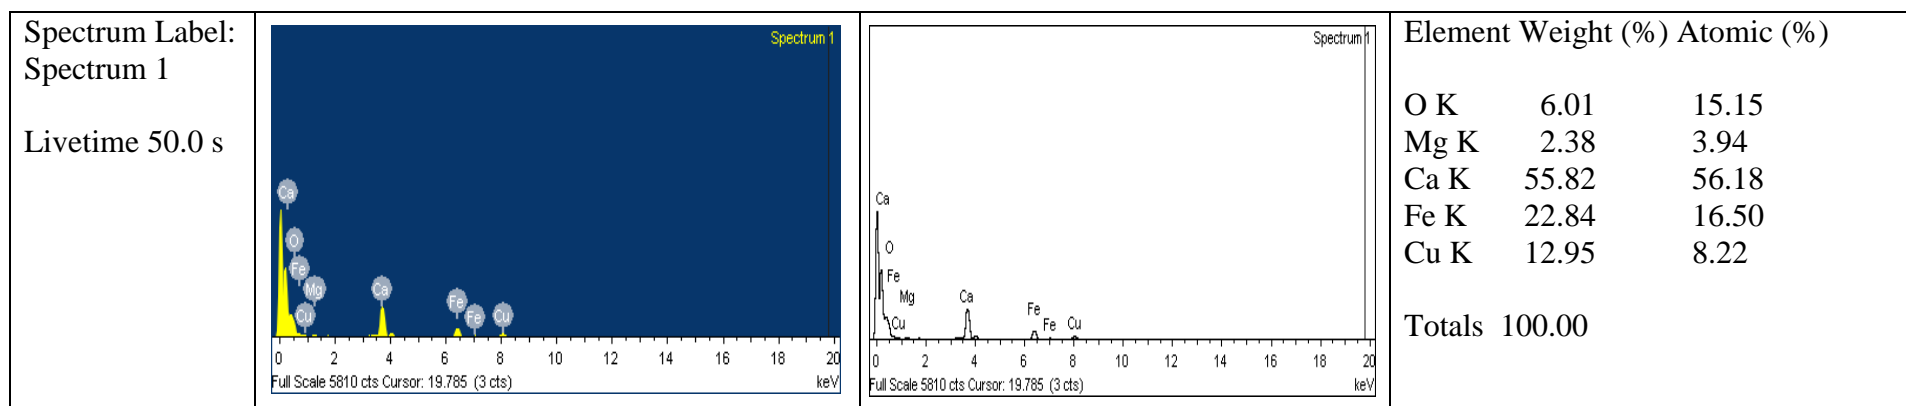

Spectrum processing :  
No peaks omitted

After removing the Cu contents

Spectrum Label:  
Spectrum 1

Livetime 50.0 s

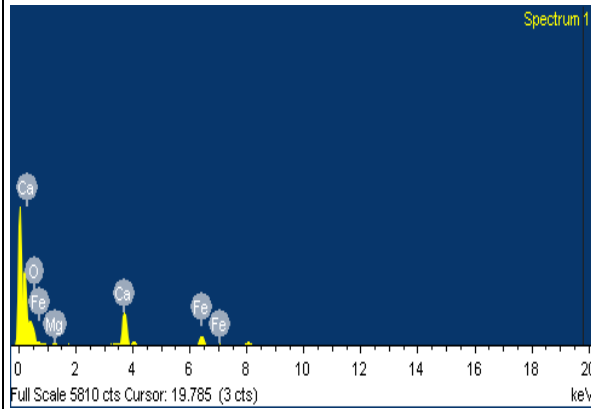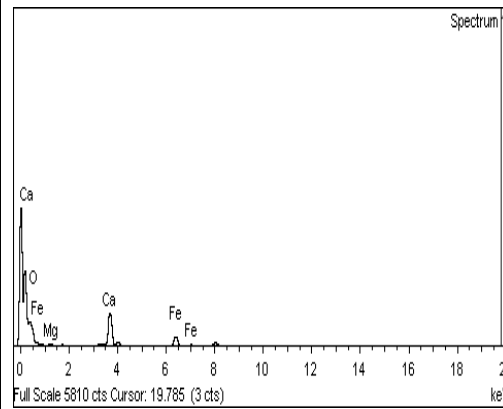

Element Weight (%) Atomic (%)

|      |       |       |
|------|-------|-------|
| O K  | 6.96  | 16.63 |
| Mg K | 2.75  | 4.32  |
| Ca K | 64.07 | 61.11 |
| Fe K | 26.22 | 17.95 |

Totals 100.00

Spectrum processing :  
Peaks possibly omitted : 8.043, 8.902 keV

Spectrum Label:  
Spectrum 2

Livetime 50.0 s

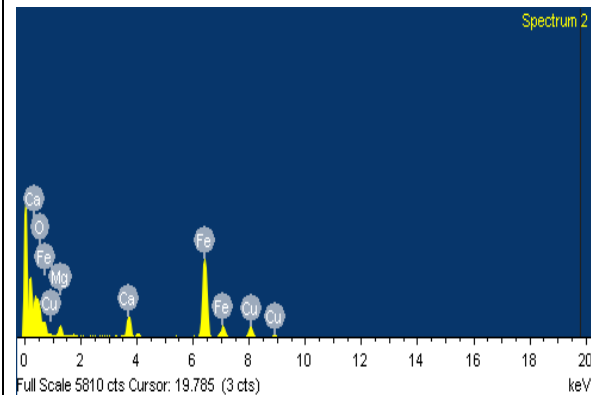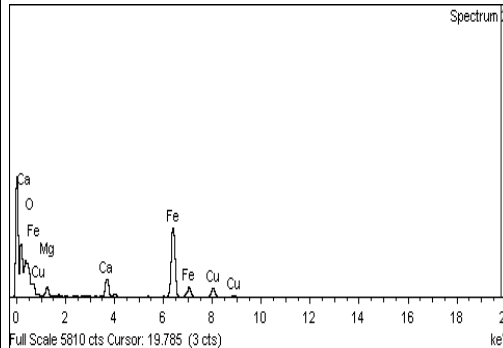

Element Weight (%) Atomic (%)

|      |       |       |
|------|-------|-------|
| O K  | 3.48  | 10.28 |
| Mg K | 4.61  | 8.95  |
| Ca K | 12.55 | 14.79 |
| Fe K | 68.52 | 57.93 |
| Cu K | 10.84 | 8.05  |

Totals 100.00

Spectrum processing :  
Peak possibly omitted : 1.740 keV

After removing the Cu contents

Spectrum Label:  
Spectrum 2

Livetime 50.0 s

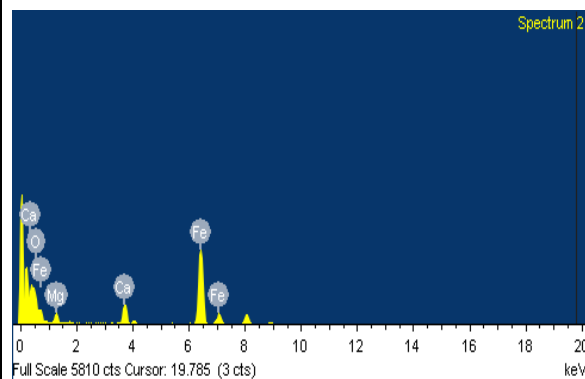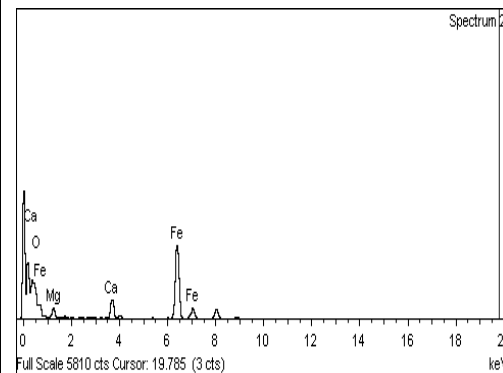

Spectrum processing :  
Peaks possibly omitted : 1.740, 8.041,  
8.904 keV

Element Weight (%) Atomic (%)

|      |       |       |
|------|-------|-------|
| O K  | 3.92  | 11.21 |
| Mg K | 5.17  | 9.73  |
| Ca K | 14.08 | 16.08 |
| Fe K | 76.84 | 62.98 |

Totals 100.00

Spectrum Label:  
Spectrum 3

Livetime 50.0 s

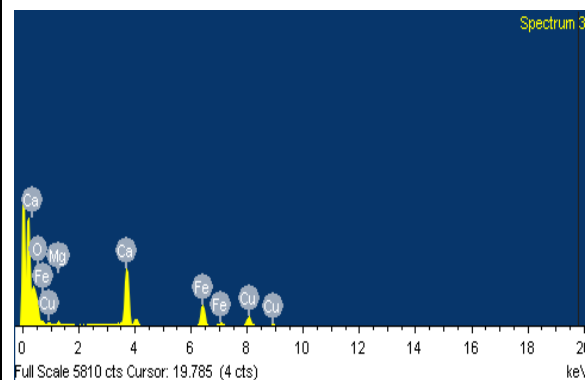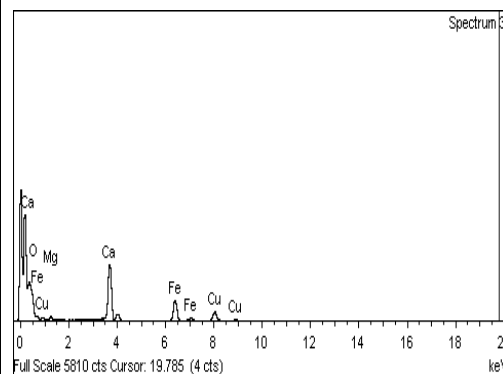

Spectrum processing :  
Peaks possibly omitted : 1.771, 9.700  
keV

Element Weight (%) Atomic (%)

|      |       |       |
|------|-------|-------|
| O K  | 4.84  | 12.71 |
| Mg K | 2.47  | 4.27  |
| Ca K | 49.71 | 52.12 |
| Fe K | 27.09 | 20.38 |
| Cu K | 15.89 | 10.51 |

Totals 100.00

After removing the Cu contents

Spectrum Label:  
Spectrum 3

Livetime 50.0 s

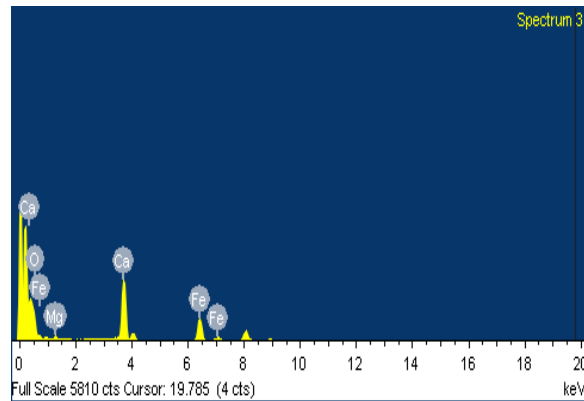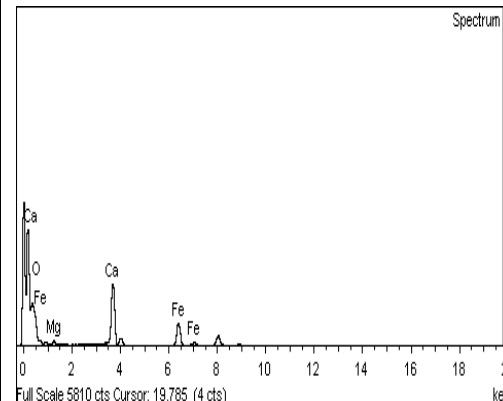

Spectrum processing :  
Peaks possibly omitted : 1.771, 8.041,  
8.912, 9.700 keV

Element Weight (%) Atomic (%)

|      |       |       |
|------|-------|-------|
| O K  | 5.83  | 14.37 |
| Mg K | 2.96  | 4.80  |
| Ca K | 59.04 | 58.11 |
| Fe K | 32.17 | 22.72 |

Totals 100.00

Spectrum Label:  
Spectrum 4

Livetime 50.0 s

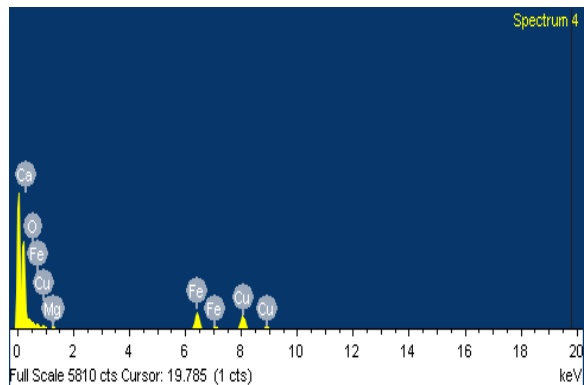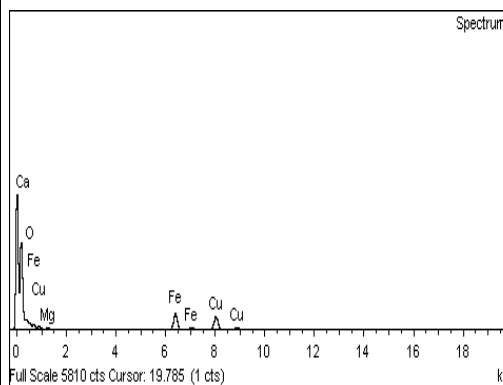

Spectrum processing :  
No peaks omitted

Element Weight (%) Atomic (%)

|      |       |       |
|------|-------|-------|
| O K  | 5.71  | 17.73 |
| Mg K | 2.66  | 5.43  |
| Ca K | 0.65  | 0.81  |
| Fe K | 44.88 | 39.95 |
| Cu K | 46.10 | 36.07 |

Totals 100.00



After removing the Cu contents

Spectrum Label:  
Spectrum 4

Livetime 50.0 s

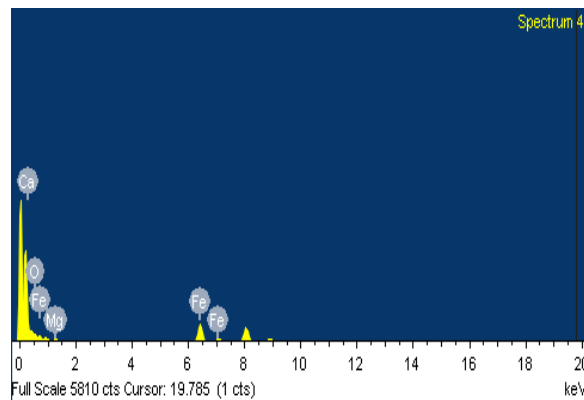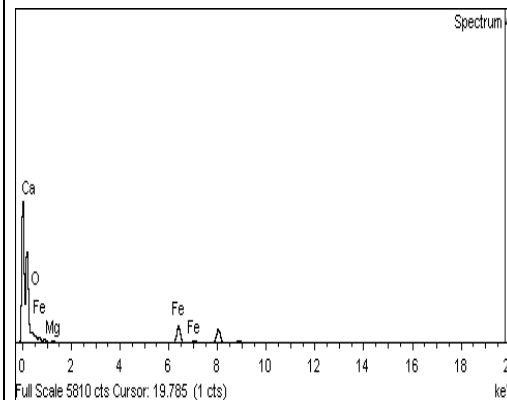

Spectrum processing :  
Peaks possibly omitted : 8.042, 8.909 keV

Element Weight (%) Atomic (%)

|      |       |       |
|------|-------|-------|
| O K  | 10.78 | 28.12 |
| Mg K | 4.98  | 8.56  |
| Ca K | 1.21  | 1.26  |
| Fe K | 83.03 | 62.06 |

Totals 100.00

Spectrum Label:  
Spectrum 5

Livetime 50.0 s

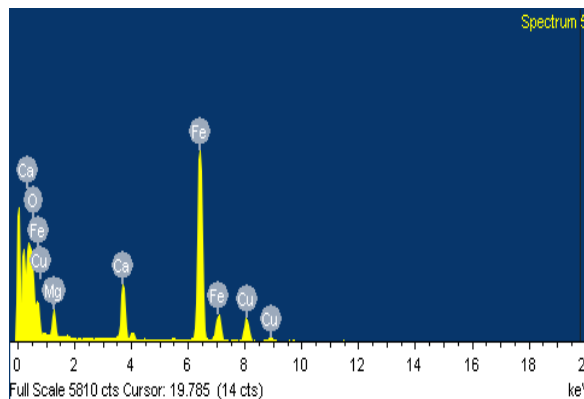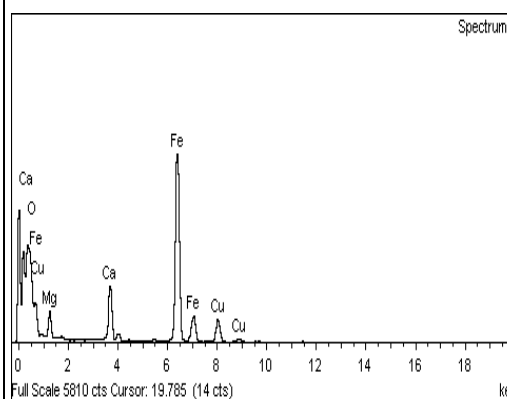

Spectrum processing :  
Peaks possibly omitted : 1.745, 5.451 keV

Element Weight (%) Atomic (%)

|      |       |       |
|------|-------|-------|
| O K  | 1.41  | 4.32  |
| Mg K | 4.99  | 10.06 |
| Ca K | 13.12 | 16.04 |
| Fe K | 70.54 | 61.91 |
| Cu K | 9.94  | 7.66  |

Totals 100.00

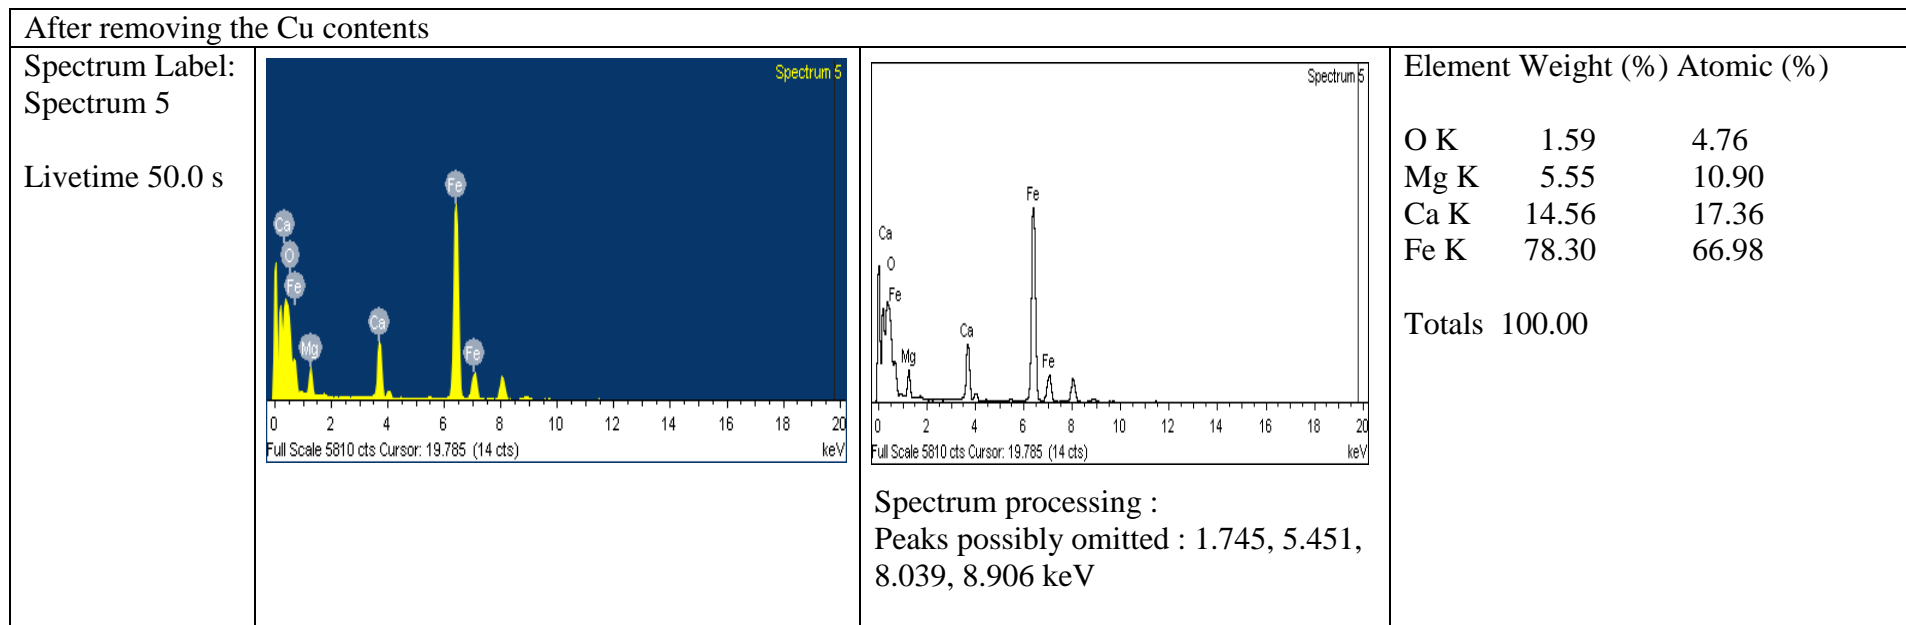

Average elemental concentrations :

| Sample                    | Element   | Weight percentage (%) |          | Atomic percentage (%) |          |
|---------------------------|-----------|-----------------------|----------|-----------------------|----------|
|                           |           | Calculated            | Measured | Calculated            | Measured |
| $Mg_{0.4}Ca_{0.6}Fe_2O_4$ | Magnesium | 4.73                  | 4.28     | 5.82                  | 10.12    |
|                           | Calcium   | 11.48                 | 30.59    | 8.55                  | 30.59    |
|                           | Iron      | 53.34                 | 59.31    | 28.54                 | 46.54    |
|                           | Oxygen    | 30.56                 | 5.82     | 57.09                 | 15.02    |

(v)  $\text{Mg}_{0.2}\text{Ca}_{0.8}\text{Fe}_2\text{O}_4$ , i.e.,  $x = 0.8$

| <p>Spectrum Label:<br/>Spectrum 1</p> <p>Livetime 50.0 s</p> | 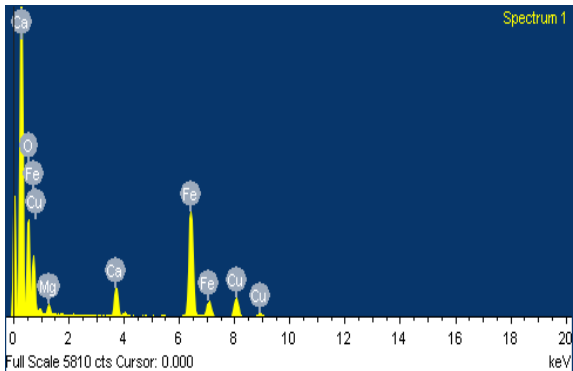  |  <p>Spectrum processing :<br/>Peaks possibly omitted : 1.750, 9.720 keV</p> | <table border="1"> <thead> <tr> <th colspan="3">Element Weight (%) Atomic (%)</th> </tr> </thead> <tbody> <tr> <td>O K</td> <td>33.11</td> <td>61.54</td> </tr> <tr> <td>Mg K</td> <td>2.52</td> <td>3.08</td> </tr> <tr> <td>Ca K</td> <td>8.46</td> <td>6.27</td> </tr> <tr> <td>Fe K</td> <td>45.63</td> <td>24.29</td> </tr> <tr> <td>Cu K</td> <td>10.29</td> <td>4.81</td> </tr> <tr> <td>Totals</td> <td>100.00</td> <td></td> </tr> </tbody> </table> | Element Weight (%) Atomic (%) |  |  | O K | 33.11 | 61.54 | Mg K | 2.52 | 3.08 | Ca K | 8.46 | 6.27 | Fe K | 45.63 | 24.29 | Cu K   | 10.29  | 4.81 | Totals | 100.00 |  |
|--------------------------------------------------------------|-------------------------------------------------------------------------------------|----------------------------------------------------------------------------------------------------------------------------------------------------------------|---------------------------------------------------------------------------------------------------------------------------------------------------------------------------------------------------------------------------------------------------------------------------------------------------------------------------------------------------------------------------------------------------------------------------------------------------------------|-------------------------------|--|--|-----|-------|-------|------|------|------|------|------|------|------|-------|-------|--------|--------|------|--------|--------|--|
| Element Weight (%) Atomic (%)                                |                                                                                     |                                                                                                                                                                |                                                                                                                                                                                                                                                                                                                                                                                                                                                               |                               |  |  |     |       |       |      |      |      |      |      |      |      |       |       |        |        |      |        |        |  |
| O K                                                          | 33.11                                                                               | 61.54                                                                                                                                                          |                                                                                                                                                                                                                                                                                                                                                                                                                                                               |                               |  |  |     |       |       |      |      |      |      |      |      |      |       |       |        |        |      |        |        |  |
| Mg K                                                         | 2.52                                                                                | 3.08                                                                                                                                                           |                                                                                                                                                                                                                                                                                                                                                                                                                                                               |                               |  |  |     |       |       |      |      |      |      |      |      |      |       |       |        |        |      |        |        |  |
| Ca K                                                         | 8.46                                                                                | 6.27                                                                                                                                                           |                                                                                                                                                                                                                                                                                                                                                                                                                                                               |                               |  |  |     |       |       |      |      |      |      |      |      |      |       |       |        |        |      |        |        |  |
| Fe K                                                         | 45.63                                                                               | 24.29                                                                                                                                                          |                                                                                                                                                                                                                                                                                                                                                                                                                                                               |                               |  |  |     |       |       |      |      |      |      |      |      |      |       |       |        |        |      |        |        |  |
| Cu K                                                         | 10.29                                                                               | 4.81                                                                                                                                                           |                                                                                                                                                                                                                                                                                                                                                                                                                                                               |                               |  |  |     |       |       |      |      |      |      |      |      |      |       |       |        |        |      |        |        |  |
| Totals                                                       | 100.00                                                                              |                                                                                                                                                                |                                                                                                                                                                                                                                                                                                                                                                                                                                                               |                               |  |  |     |       |       |      |      |      |      |      |      |      |       |       |        |        |      |        |        |  |
| <p>After removing the Cu contents</p>                        |                                                                                     |                                                                                                                                                                |                                                                                                                                                                                                                                                                                                                                                                                                                                                               |                               |  |  |     |       |       |      |      |      |      |      |      |      |       |       |        |        |      |        |        |  |
| <p>Spectrum Label:<br/>Spectrum 1</p> <p>Livetime 50.0 s</p> |  |                                                                            | <table border="1"> <thead> <tr> <th colspan="3">Element Weight (%) Atomic (%)</th> </tr> </thead> <tbody> <tr> <td>O K</td> <td>36.93</td> <td>64.67</td> </tr> <tr> <td>Mg K</td> <td>2.82</td> <td>3.25</td> </tr> <tr> <td>Ca K</td> <td>9.42</td> <td>6.59</td> </tr> <tr> <td>Fe K</td> <td>50.83</td> <td>25.50</td> </tr> <tr> <td>Totals</td> <td>100.00</td> <td></td> </tr> </tbody> </table>                                                       | Element Weight (%) Atomic (%) |  |  | O K | 36.93 | 64.67 | Mg K | 2.82 | 3.25 | Ca K | 9.42 | 6.59 | Fe K | 50.83 | 25.50 | Totals | 100.00 |      |        |        |  |
| Element Weight (%) Atomic (%)                                |                                                                                     |                                                                                                                                                                |                                                                                                                                                                                                                                                                                                                                                                                                                                                               |                               |  |  |     |       |       |      |      |      |      |      |      |      |       |       |        |        |      |        |        |  |
| O K                                                          | 36.93                                                                               | 64.67                                                                                                                                                          |                                                                                                                                                                                                                                                                                                                                                                                                                                                               |                               |  |  |     |       |       |      |      |      |      |      |      |      |       |       |        |        |      |        |        |  |
| Mg K                                                         | 2.82                                                                                | 3.25                                                                                                                                                           |                                                                                                                                                                                                                                                                                                                                                                                                                                                               |                               |  |  |     |       |       |      |      |      |      |      |      |      |       |       |        |        |      |        |        |  |
| Ca K                                                         | 9.42                                                                                | 6.59                                                                                                                                                           |                                                                                                                                                                                                                                                                                                                                                                                                                                                               |                               |  |  |     |       |       |      |      |      |      |      |      |      |       |       |        |        |      |        |        |  |
| Fe K                                                         | 50.83                                                                               | 25.50                                                                                                                                                          |                                                                                                                                                                                                                                                                                                                                                                                                                                                               |                               |  |  |     |       |       |      |      |      |      |      |      |      |       |       |        |        |      |        |        |  |
| Totals                                                       | 100.00                                                                              |                                                                                                                                                                |                                                                                                                                                                                                                                                                                                                                                                                                                                                               |                               |  |  |     |       |       |      |      |      |      |      |      |      |       |       |        |        |      |        |        |  |

|                                                              |                                                                                     |                                                                                                                                                                                                                                                     |                                                                                                                                                                                                                                                                                                                                                                                                                                                                        |     |       |       |     |       |       |      |      |      |      |      |      |      |       |      |        |        |      |        |        |  |
|--------------------------------------------------------------|-------------------------------------------------------------------------------------|-----------------------------------------------------------------------------------------------------------------------------------------------------------------------------------------------------------------------------------------------------|------------------------------------------------------------------------------------------------------------------------------------------------------------------------------------------------------------------------------------------------------------------------------------------------------------------------------------------------------------------------------------------------------------------------------------------------------------------------|-----|-------|-------|-----|-------|-------|------|------|------|------|------|------|------|-------|------|--------|--------|------|--------|--------|--|
| <p>Spectrum Label:<br/>Spectrum 2</p> <p>Livetime 50.0 s</p> | 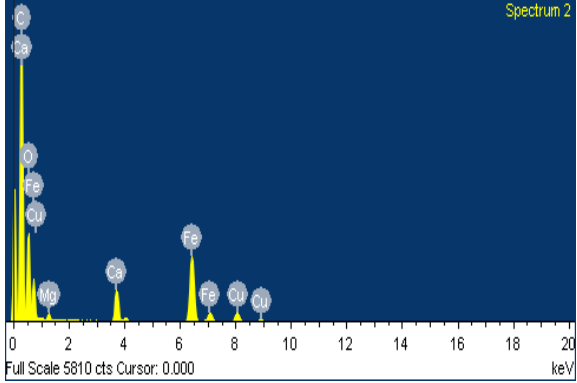  | <p>Spectrum processing :<br/>Peaks possibly omitted : 1.750, 8.047,<br/>8.907, 9.720 keV</p>  <p>Spectrum processing :<br/>Peak possibly omitted : 9.700 keV</p> | <p>Element Weight (%) Atomic(%)</p> <table border="1"> <tbody> <tr> <td>C K</td> <td>59.67</td> <td>76.67</td> </tr> <tr> <td>O K</td> <td>16.63</td> <td>16.05</td> </tr> <tr> <td>Mg K</td> <td>0.79</td> <td>0.50</td> </tr> <tr> <td>Ca K</td> <td>4.96</td> <td>1.91</td> </tr> <tr> <td>Fe K</td> <td>15.29</td> <td>4.23</td> </tr> <tr> <td>Cu K</td> <td>2.65</td> <td>0.64</td> </tr> <tr> <td>Totals</td> <td>100.00</td> <td></td> </tr> </tbody> </table> | C K | 59.67 | 76.67 | O K | 16.63 | 16.05 | Mg K | 0.79 | 0.50 | Ca K | 4.96 | 1.91 | Fe K | 15.29 | 4.23 | Cu K   | 2.65   | 0.64 | Totals | 100.00 |  |
| C K                                                          | 59.67                                                                               | 76.67                                                                                                                                                                                                                                               |                                                                                                                                                                                                                                                                                                                                                                                                                                                                        |     |       |       |     |       |       |      |      |      |      |      |      |      |       |      |        |        |      |        |        |  |
| O K                                                          | 16.63                                                                               | 16.05                                                                                                                                                                                                                                               |                                                                                                                                                                                                                                                                                                                                                                                                                                                                        |     |       |       |     |       |       |      |      |      |      |      |      |      |       |      |        |        |      |        |        |  |
| Mg K                                                         | 0.79                                                                                | 0.50                                                                                                                                                                                                                                                |                                                                                                                                                                                                                                                                                                                                                                                                                                                                        |     |       |       |     |       |       |      |      |      |      |      |      |      |       |      |        |        |      |        |        |  |
| Ca K                                                         | 4.96                                                                                | 1.91                                                                                                                                                                                                                                                |                                                                                                                                                                                                                                                                                                                                                                                                                                                                        |     |       |       |     |       |       |      |      |      |      |      |      |      |       |      |        |        |      |        |        |  |
| Fe K                                                         | 15.29                                                                               | 4.23                                                                                                                                                                                                                                                |                                                                                                                                                                                                                                                                                                                                                                                                                                                                        |     |       |       |     |       |       |      |      |      |      |      |      |      |       |      |        |        |      |        |        |  |
| Cu K                                                         | 2.65                                                                                | 0.64                                                                                                                                                                                                                                                |                                                                                                                                                                                                                                                                                                                                                                                                                                                                        |     |       |       |     |       |       |      |      |      |      |      |      |      |       |      |        |        |      |        |        |  |
| Totals                                                       | 100.00                                                                              |                                                                                                                                                                                                                                                     |                                                                                                                                                                                                                                                                                                                                                                                                                                                                        |     |       |       |     |       |       |      |      |      |      |      |      |      |       |      |        |        |      |        |        |  |
| <p>After removing the Cu contents</p>                        |                                                                                     |                                                                                                                                                                                                                                                     |                                                                                                                                                                                                                                                                                                                                                                                                                                                                        |     |       |       |     |       |       |      |      |      |      |      |      |      |       |      |        |        |      |        |        |  |
| <p>Spectrum Label:<br/>Spectrum 2</p> <p>Livetime 50.0 s</p> |  |  <p>Spectrum processing :<br/>Peaks possibly omitted : 8.046, 8.902,<br/>9.700 keV</p>                                                                          | <p>Element Weight (%) Atomic (%)</p> <table border="1"> <tbody> <tr> <td>C K</td> <td>61.29</td> <td>77.16</td> </tr> <tr> <td>O K</td> <td>17.09</td> <td>16.16</td> </tr> <tr> <td>Mg K</td> <td>0.81</td> <td>0.51</td> </tr> <tr> <td>Ca K</td> <td>5.10</td> <td>1.92</td> </tr> <tr> <td>Fe K</td> <td>15.71</td> <td>4.25</td> </tr> <tr> <td>Totals</td> <td>100.00</td> <td></td> </tr> </tbody> </table>                                                     | C K | 61.29 | 77.16 | O K | 17.09 | 16.16 | Mg K | 0.81 | 0.51 | Ca K | 5.10 | 1.92 | Fe K | 15.71 | 4.25 | Totals | 100.00 |      |        |        |  |
| C K                                                          | 61.29                                                                               | 77.16                                                                                                                                                                                                                                               |                                                                                                                                                                                                                                                                                                                                                                                                                                                                        |     |       |       |     |       |       |      |      |      |      |      |      |      |       |      |        |        |      |        |        |  |
| O K                                                          | 17.09                                                                               | 16.16                                                                                                                                                                                                                                               |                                                                                                                                                                                                                                                                                                                                                                                                                                                                        |     |       |       |     |       |       |      |      |      |      |      |      |      |       |      |        |        |      |        |        |  |
| Mg K                                                         | 0.81                                                                                | 0.51                                                                                                                                                                                                                                                |                                                                                                                                                                                                                                                                                                                                                                                                                                                                        |     |       |       |     |       |       |      |      |      |      |      |      |      |       |      |        |        |      |        |        |  |
| Ca K                                                         | 5.10                                                                                | 1.92                                                                                                                                                                                                                                                |                                                                                                                                                                                                                                                                                                                                                                                                                                                                        |     |       |       |     |       |       |      |      |      |      |      |      |      |       |      |        |        |      |        |        |  |
| Fe K                                                         | 15.71                                                                               | 4.25                                                                                                                                                                                                                                                |                                                                                                                                                                                                                                                                                                                                                                                                                                                                        |     |       |       |     |       |       |      |      |      |      |      |      |      |       |      |        |        |      |        |        |  |
| Totals                                                       | 100.00                                                                              |                                                                                                                                                                                                                                                     |                                                                                                                                                                                                                                                                                                                                                                                                                                                                        |     |       |       |     |       |       |      |      |      |      |      |      |      |       |      |        |        |      |        |        |  |

Spectrum Label:  
Spectrum 3

Livetime 50.0 s

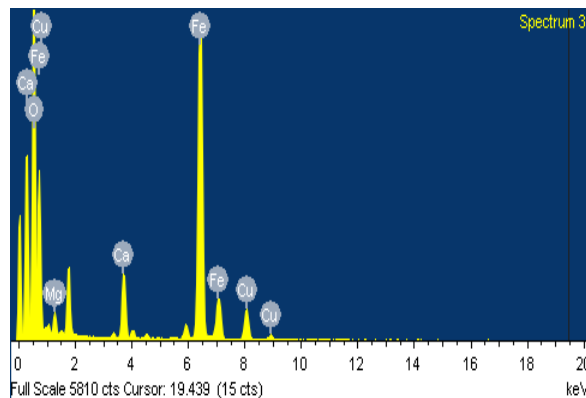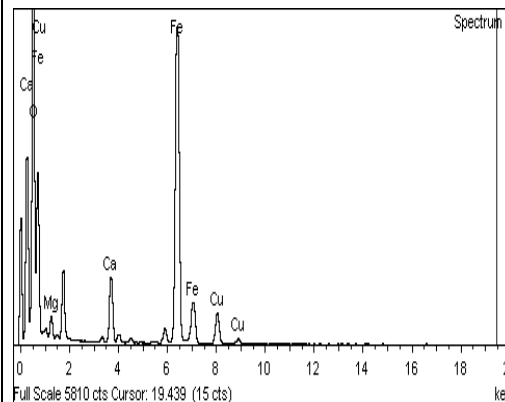

Element Weight (%) Atomic (%)

| Element | Weight (%) | Atomic (%) |
|---------|------------|------------|
| O K     | 40.96      | 69.32      |
| Mg K    | 1.91       | 2.12       |
| Ca K    | 6.16       | 4.16       |
| Fe K    | 45.63      | 22.12      |
| Cu K    | 5.34       | 2.28       |

Totals 100.00

Spectrum processing :  
Peaks possibly omitted : 1.746, 4.521,  
5.417, 9.701, 15.750 keV

After removing the Cu contents

Spectrum Label:  
Spectrum 3

Livetime 50.0 s

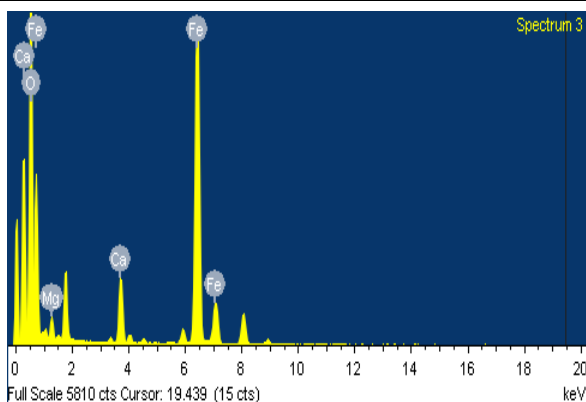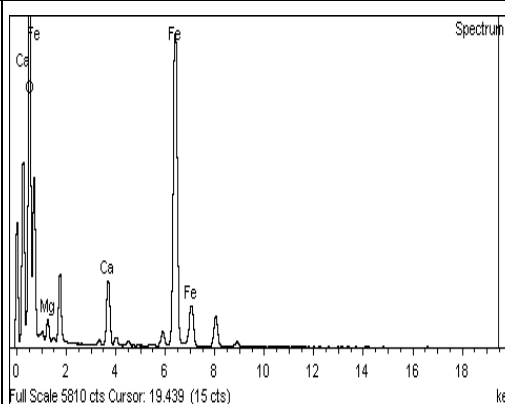

Element Weight (%) Atomic (%)

| Element | Weight (%) | Atomic (%) |
|---------|------------|------------|
| O K     | 43.27      | 70.93      |
| Mg K    | 2.01       | 2.17       |
| Ca K    | 6.51       | 4.26       |
| Fe K    | 48.21      | 22.64      |

Totals 100.00

Spectrum processing :  
Peaks possibly omitted : 1.746, 4.521,  
5.417, 8.047, 8.912, 9.701, 15.750  
keV

Spectrum Label:  
Spectrum 4

Livetime 50.0 s

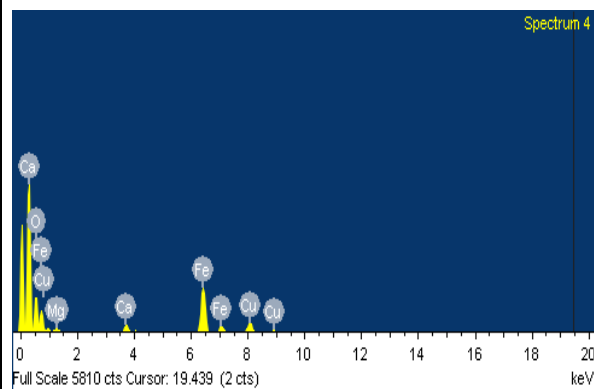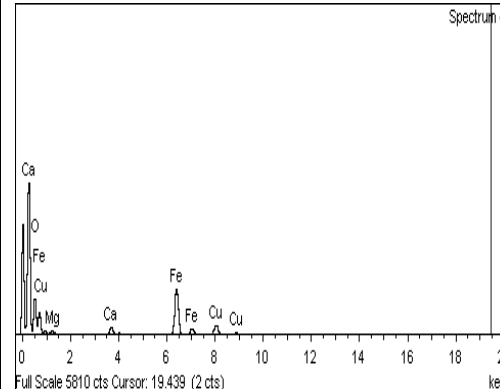

Element Weight (%) Atomic (%)

|      |       |       |
|------|-------|-------|
| O K  | 30.59 | 59.65 |
| Mg K | 1.83  | 2.35  |
| Ca K | 5.16  | 4.01  |
| Fe K | 49.25 | 27.51 |
| Cu K | 13.17 | 6.47  |

Totals 100.00

After removing the Cu contents

Spectrum Label:  
Spectrum 4

Livetime 50.0 s

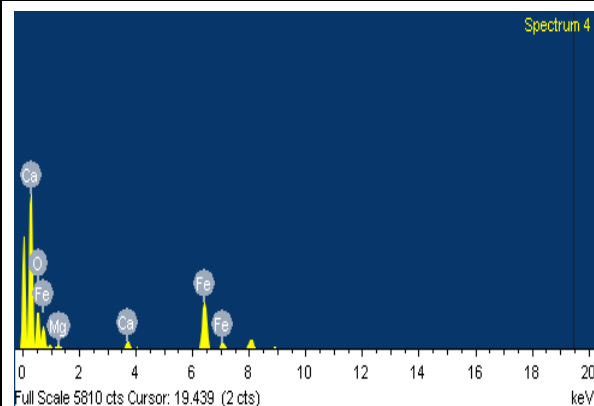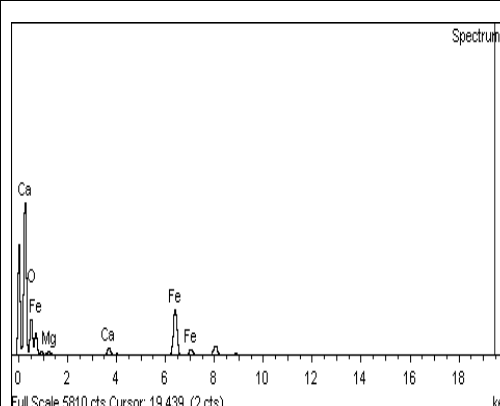

Element Weight (%) Atomic (%)

|      |       |       |
|------|-------|-------|
| O K  | 35.27 | 63.81 |
| Mg K | 2.13  | 2.53  |
| Ca K | 5.93  | 4.28  |
| Fe K | 56.67 | 29.37 |

Totals 100.00

Spectrum processing :  
Peaks possibly omitted : 8.049, 8.901 keV

Average elemental concentrations :

| Sample                    | Element   | Weight percentage (%) |          | Atomic percentage (%) |          |
|---------------------------|-----------|-----------------------|----------|-----------------------|----------|
|                           |           | Calculated            | Measured | Calculated            | Measured |
| $Mg_{0.2}Ca_{0.8}Fe_2O_4$ | Magnesium | 2.29                  | 1.94     | 2.86                  | 1.94     |
|                           | Calcium   | 15.08                 | 6.74     | 11.43                 | 4.26     |
|                           | Iron      | 52.53                 | 42.86    | 28.57                 | 29.37    |
|                           | Oxygen    | 30.10                 | 35.27    | 57.14                 | 63.81    |

(i)  $CaFeO_4$ , i.e.,  $x = 1$ .

| <p>Spectrum Label:<br/>Spectrum 1</p> <p>Live time 50.0 s</p>                                       | 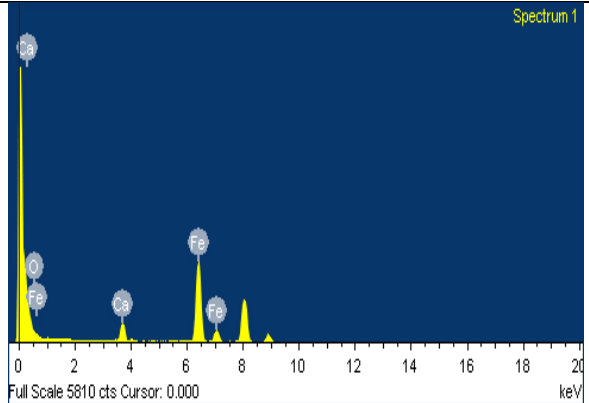 <p>Full Scale 5810 cts Cursor: 0.000 keV</p> |  <p>Full Scale 5810 cts Cursor: 0.000 keV</p> | <table border="1"> <thead> <tr> <th>Element</th> <th>Weight (%)</th> <th>Atomic (%)</th> </tr> </thead> <tbody> <tr> <td>O K</td> <td>0.09</td> <td>0.30</td> </tr> <tr> <td>Ca K</td> <td>13.18</td> <td>17.42</td> </tr> <tr> <td>Fe K</td> <td>86.73</td> <td>82.28</td> </tr> <tr> <td>Totals</td> <td>100.00</td> <td></td> </tr> </tbody> </table> | Element | Weight (%) | Atomic (%) | O K | 0.09 | 0.30 | Ca K | 13.18 | 17.42 | Fe K | 86.73 | 82.28 | Totals | 100.00 |  |
|-----------------------------------------------------------------------------------------------------|----------------------------------------------------------------------------------------------------------------------------------|-----------------------------------------------------------------------------------------------------------------------------------|----------------------------------------------------------------------------------------------------------------------------------------------------------------------------------------------------------------------------------------------------------------------------------------------------------------------------------------------------------|---------|------------|------------|-----|------|------|------|-------|-------|------|-------|-------|--------|--------|--|
| Element                                                                                             | Weight (%)                                                                                                                       | Atomic (%)                                                                                                                        |                                                                                                                                                                                                                                                                                                                                                          |         |            |            |     |      |      |      |       |       |      |       |       |        |        |  |
| O K                                                                                                 | 0.09                                                                                                                             | 0.30                                                                                                                              |                                                                                                                                                                                                                                                                                                                                                          |         |            |            |     |      |      |      |       |       |      |       |       |        |        |  |
| Ca K                                                                                                | 13.18                                                                                                                            | 17.42                                                                                                                             |                                                                                                                                                                                                                                                                                                                                                          |         |            |            |     |      |      |      |       |       |      |       |       |        |        |  |
| Fe K                                                                                                | 86.73                                                                                                                            | 82.28                                                                                                                             |                                                                                                                                                                                                                                                                                                                                                          |         |            |            |     |      |      |      |       |       |      |       |       |        |        |  |
| Totals                                                                                              | 100.00                                                                                                                           |                                                                                                                                   |                                                                                                                                                                                                                                                                                                                                                          |         |            |            |     |      |      |      |       |       |      |       |       |        |        |  |
| <p>Spectrum processing :<br/>Peaks possibly omitted : 1.760, 5.390,<br/>8.024, 8.884, 9.676 keV</p> |                                                                                                                                  |                                                                                                                                   |                                                                                                                                                                                                                                                                                                                                                          |         |            |            |     |      |      |      |       |       |      |       |       |        |        |  |

Spectrum Label:  
Spectrum 2

Live time 50.0 s

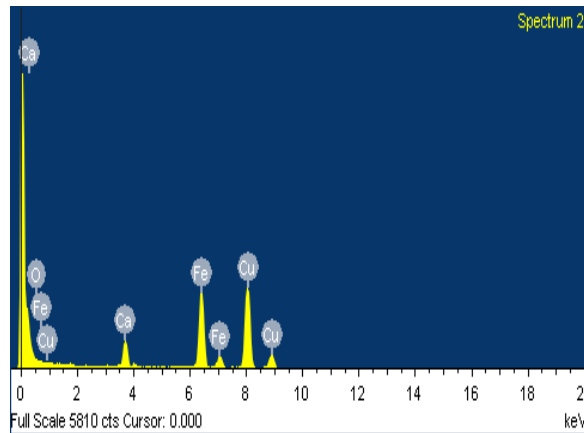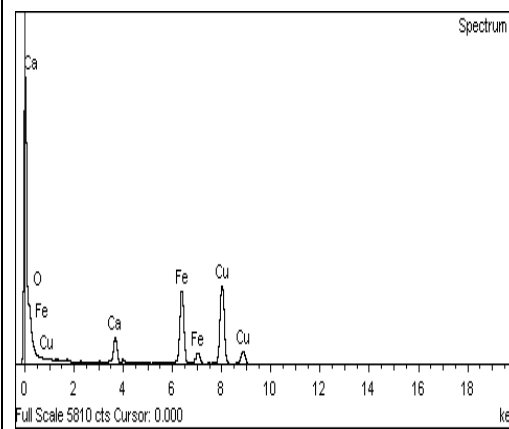

Element Weight (%) Atomic (%)

|      |       |       |
|------|-------|-------|
| O K  | 0.48  | 1.69  |
| Ca K | 8.78  | 12.45 |
| Fe K | 38.57 | 39.22 |
| Cu K | 52.17 | 46.64 |

Totals 100.00

Spectrum processing :  
Peaks possibly omitted : 1.735, 9.680 keV

After removing the Cu contents

Spectrum Label:  
Spectrum 2

Livetime 50.0 s

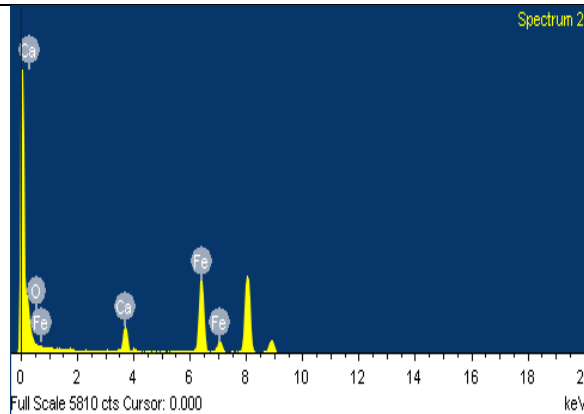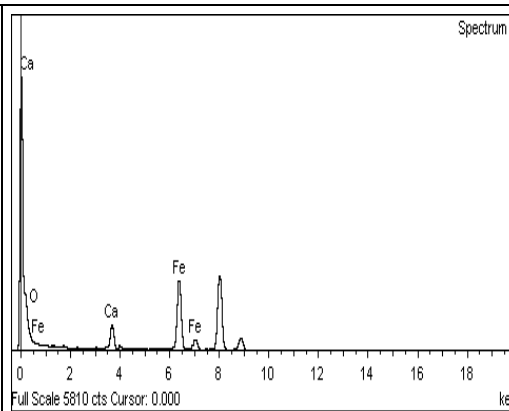

Element Weight (%) Atomic (%)

|      |       |       |
|------|-------|-------|
| O K  | 1.00  | 3.18  |
| Ca K | 18.36 | 23.32 |
| Fe K | 80.64 | 73.50 |

Totals 100.00

Spectrum processing :  
Peaks possibly omitted : 1.735, 8.023, 8.884, 9.680 keV



Spectrum Label:  
Spectrum 3

Livetime 50.0 s

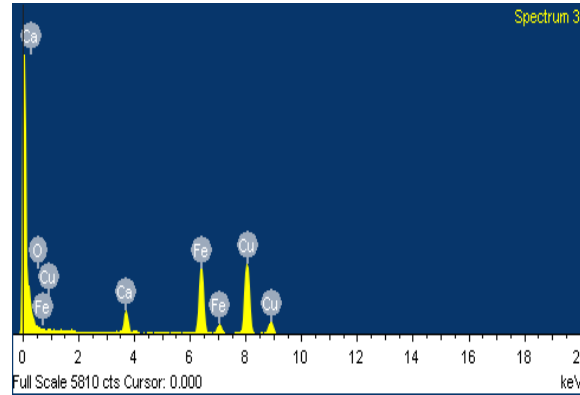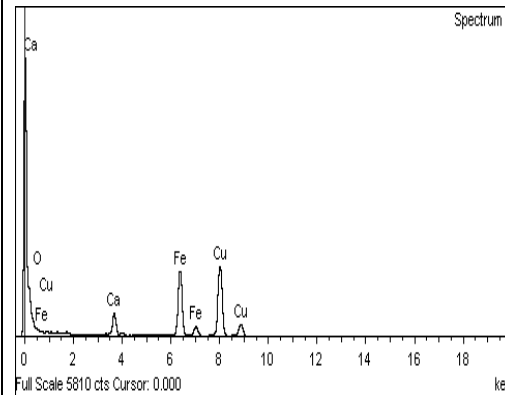

Element Weight (%) Atomic (%)

|      |       |       |
|------|-------|-------|
| O K  | 0.48  | 1.71  |
| Ca K | 8.15  | 11.59 |
| Fe K | 38.31 | 39.10 |
| Cu K | 53.06 | 47.60 |

Totals 100.00

Spectrum processing :  
Peaks possibly omitted : 1.725, 5.399,  
9.693 keV

After removing the Cu contents

Spectrum Label:  
Spectrum 3

Livetime 50.0 s

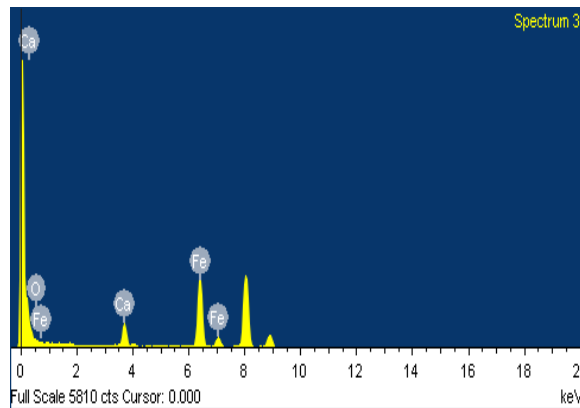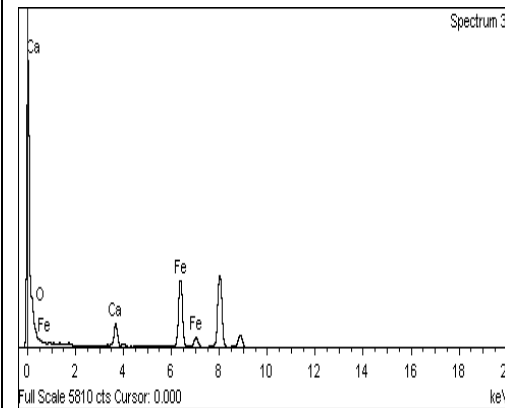

Element Weight (%) Atomic (%)

|      |       |       |
|------|-------|-------|
| O K  | 1.07  | 3.41  |
| Ca K | 17.35 | 22.08 |
| Fe K | 81.58 | 74.51 |

Totals 100.00

Spectrum processing :  
Peaks possibly omitted : 1.725, 5.399,  
8.023, 8.884, 9.693 keV

Spectrum Label:  
Spectrum 4

Livetime 50.0 s

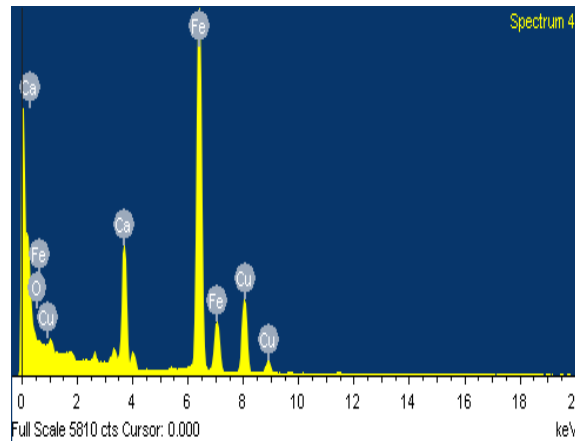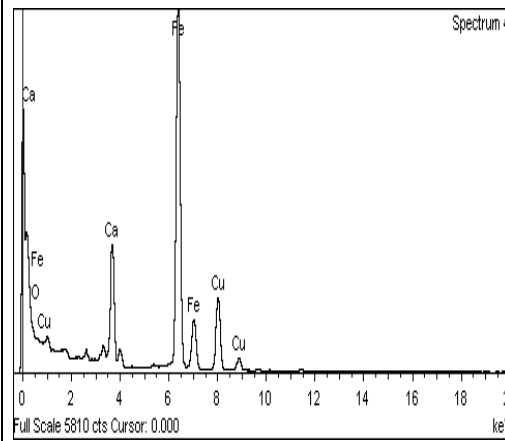

Element Weight(%) Atomic(%)

|      |       |       |
|------|-------|-------|
| O K  | 0.16  | 0.54  |
| Ca K | 14.74 | 19.72 |
| Fe K | 68.23 | 65.51 |
| Cu K | 16.87 | 14.24 |

Totals 100.00

After removing the Cu contents

Spectrum Label:  
Spectrum 4

Live time 50.0 s

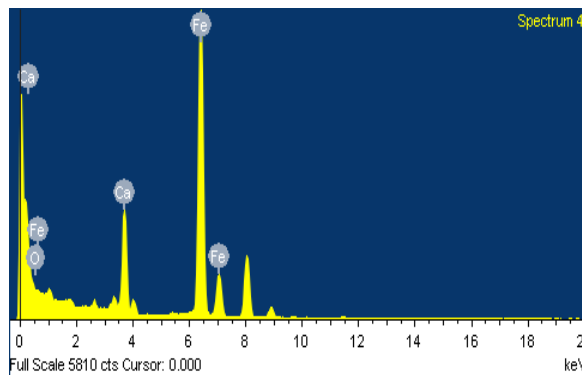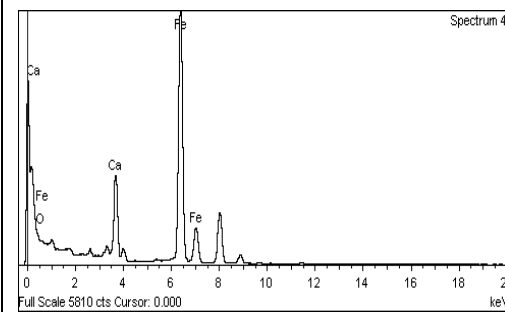

Element Weight (%) Atomic (%)

|      |       |       |
|------|-------|-------|
| O K  | 0.16  | 0.52  |
| Ca K | 17.73 | 23.01 |
| Fe K | 82.10 | 76.47 |

Totals 100.00

Spectrum processing :  
Peaks possibly omitted : 1.762, 2.608,  
5.385, 8.022, 8.882, 9.679, 11.420,  
16.568, 18.690 keV

Spectrum Label:  
Spectrum 5

Livetime 50.0 s

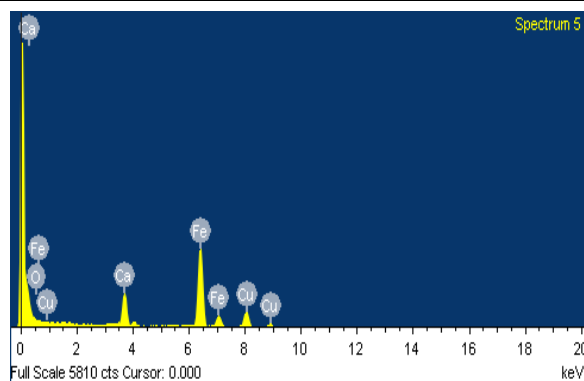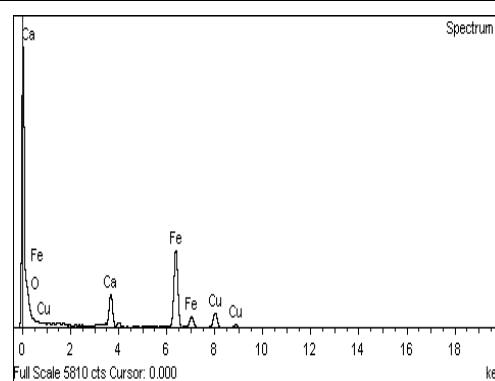

Element Weight (%) Atomic (%)

|      |       |       |
|------|-------|-------|
| O K  | 0.14  | 0.45  |
| Ca K | 17.88 | 23.62 |
| Fe K | 66.01 | 62.60 |
| Cu K | 15.98 | 13.32 |

Totals 100.00

Spectrum processing :  
Peaks possibly omitted : 9.699, 11.505 keV

After removing the Cu contents

Spectrum Label:  
Spectrum 5

Livetime 50.0 s

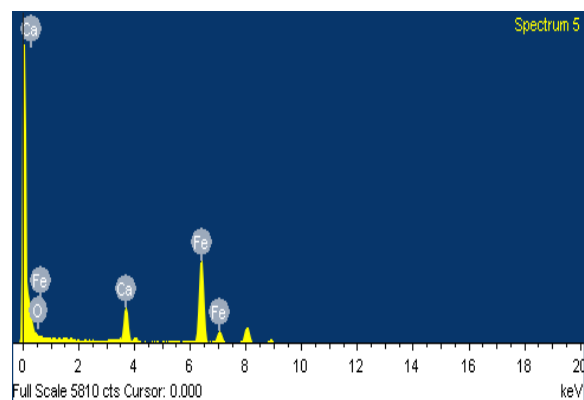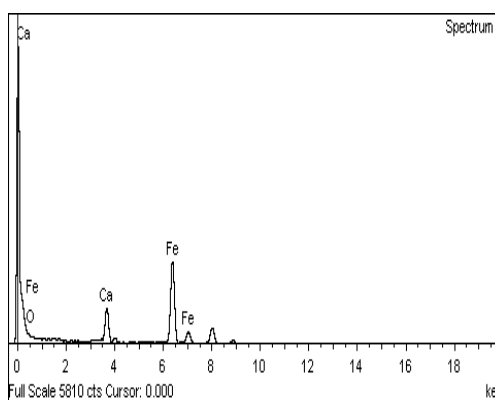

Element Weight (%) Atomic (%)

|      |       |       |
|------|-------|-------|
| O K  | 0.19  | 0.60  |
| Ca K | 21.27 | 27.23 |
| Fe K | 78.54 | 72.17 |

Totals 100.00

Spectrum processing :  
Peaks possibly omitted : 8.023, 8.884, 9.699, 11.505 keV

Average elemental concentrations :

| Sample                           | Element   | Weight percentage (%) |          | Atomic percentage (%) |          |
|----------------------------------|-----------|-----------------------|----------|-----------------------|----------|
|                                  |           | Calculated            | Measured | Calculated            | Measured |
| CaFe <sub>2</sub> O <sub>4</sub> | Magnesium | 0                     | 0        | 0                     | 0        |
|                                  | Calcium   | 18.57                 | 17.58    | 14.28                 | 22.61    |
|                                  | Iron      | 51.77                 | 81.92    | 28.57                 | 75.79    |
|                                  | Oxygen    | 29.66                 | 0.502    | 57.15                 | 1.602    |
