# Supplementary material for: Defect-focused analysis of calcium-substitution-induced structural transformation of magnesium ferrite nanocrystals
Source: Royal Society of Chemistry journal article supplement (doi:10.1039/c9nj04068d), 2019-12-19

### Electronic supplemental information ESI – III

Peak-normalized positron lifetime spectra of all the samples.

Title : Defects-focused analysis of calcium-substitution-induced structural transformation of magnesium ferrite nanocrystals

Authors : Ann Rose Abraham, B. Raneesh, D. Sanyal, Sabu Thomas, Nandakumar Kalarikkal and P.M.G. Nambissan

Journal : New Journal of Chemistry

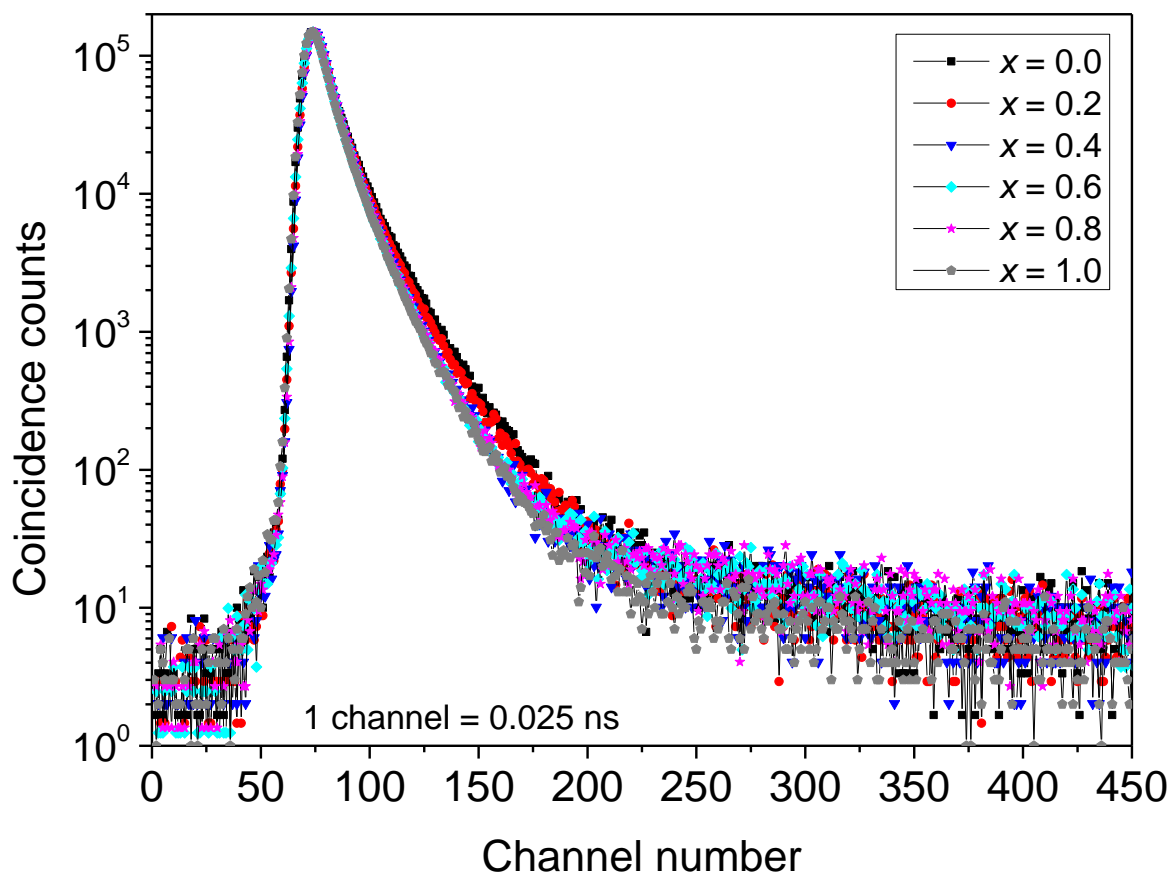

Supplement: c9nj04068d3.pdf [file c9nj04068d3.pdf]
